# Supplementary material for: Selective N-monoalkylation of aromatic amines with benzylic alcohols by a hydrogen autotransfer process catalyzed by unmodified magnetite
Source: Royal Society of Chemistry journal article supplement (doi:10.1039/b901929d), 2009-01-01

*Supplementary Material*

**Selective *N*-Monoalkylation of Aromatic Amines with Benzylic Alcohols by a Hydrogen Autotransfer Process Catalyzed by Unmodified Magnetite**

Ricardo Martínez, Diego J. Ramón,\* Miguel Yus\*

Instituto de Síntesis Orgánica (ISO), and Departamento de Química Orgánica, Facultad de Ciencias,  
Universidad de Alicante, Apdo. 99, E-03080-Alicante, Spain

E-mail: djramon@ua.es, yus@ua.es

Contents

|                                                                         |   |
|-------------------------------------------------------------------------|---|
| TEM-images of magnetite before used                                     | 2 |
| TEM-images of magnetite after eight-time used                           | 3 |
| <sup>1</sup> H and <sup>13</sup> C NMR spectra of compounds <b>3a-n</b> | 4 |

**TEM-images of magnetite before used**

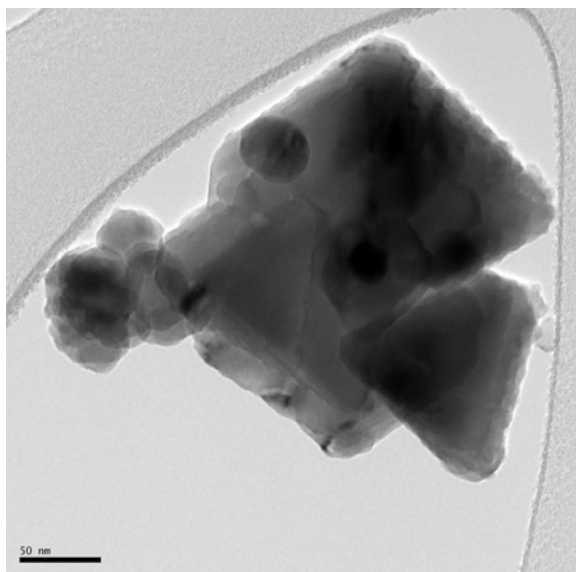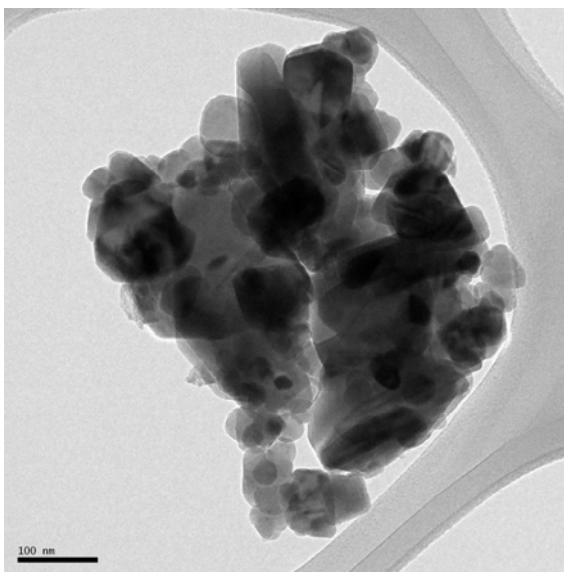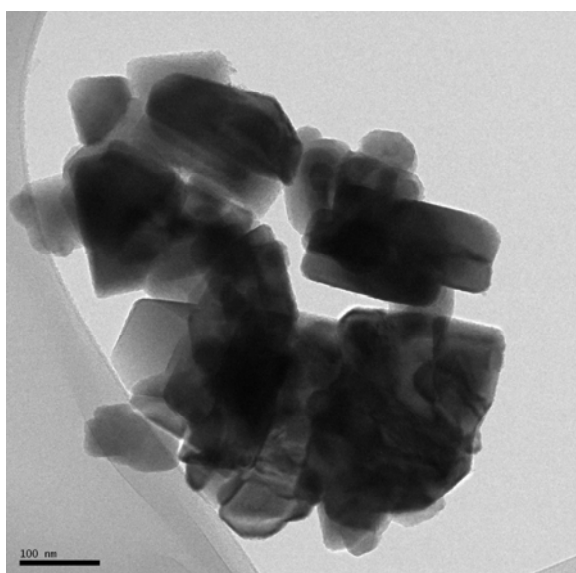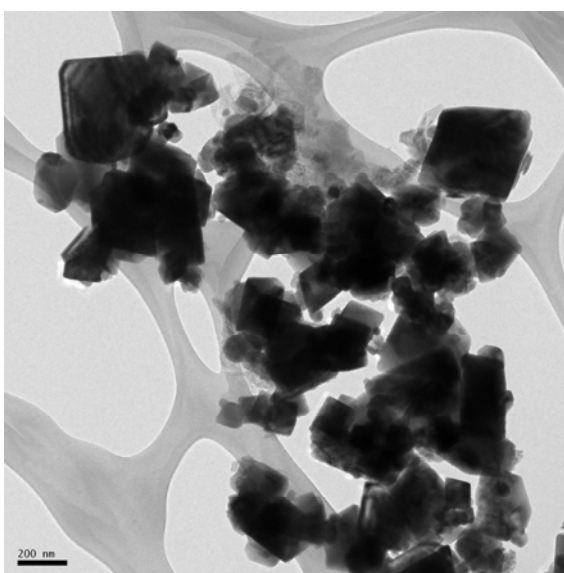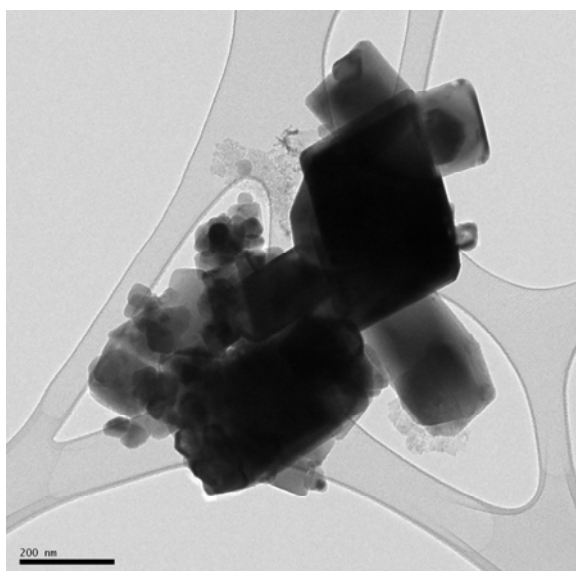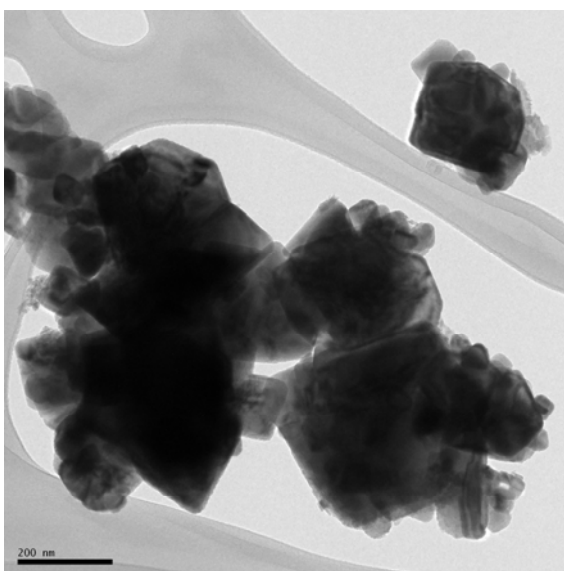

**TEM-images of magnetite after eight-time used**

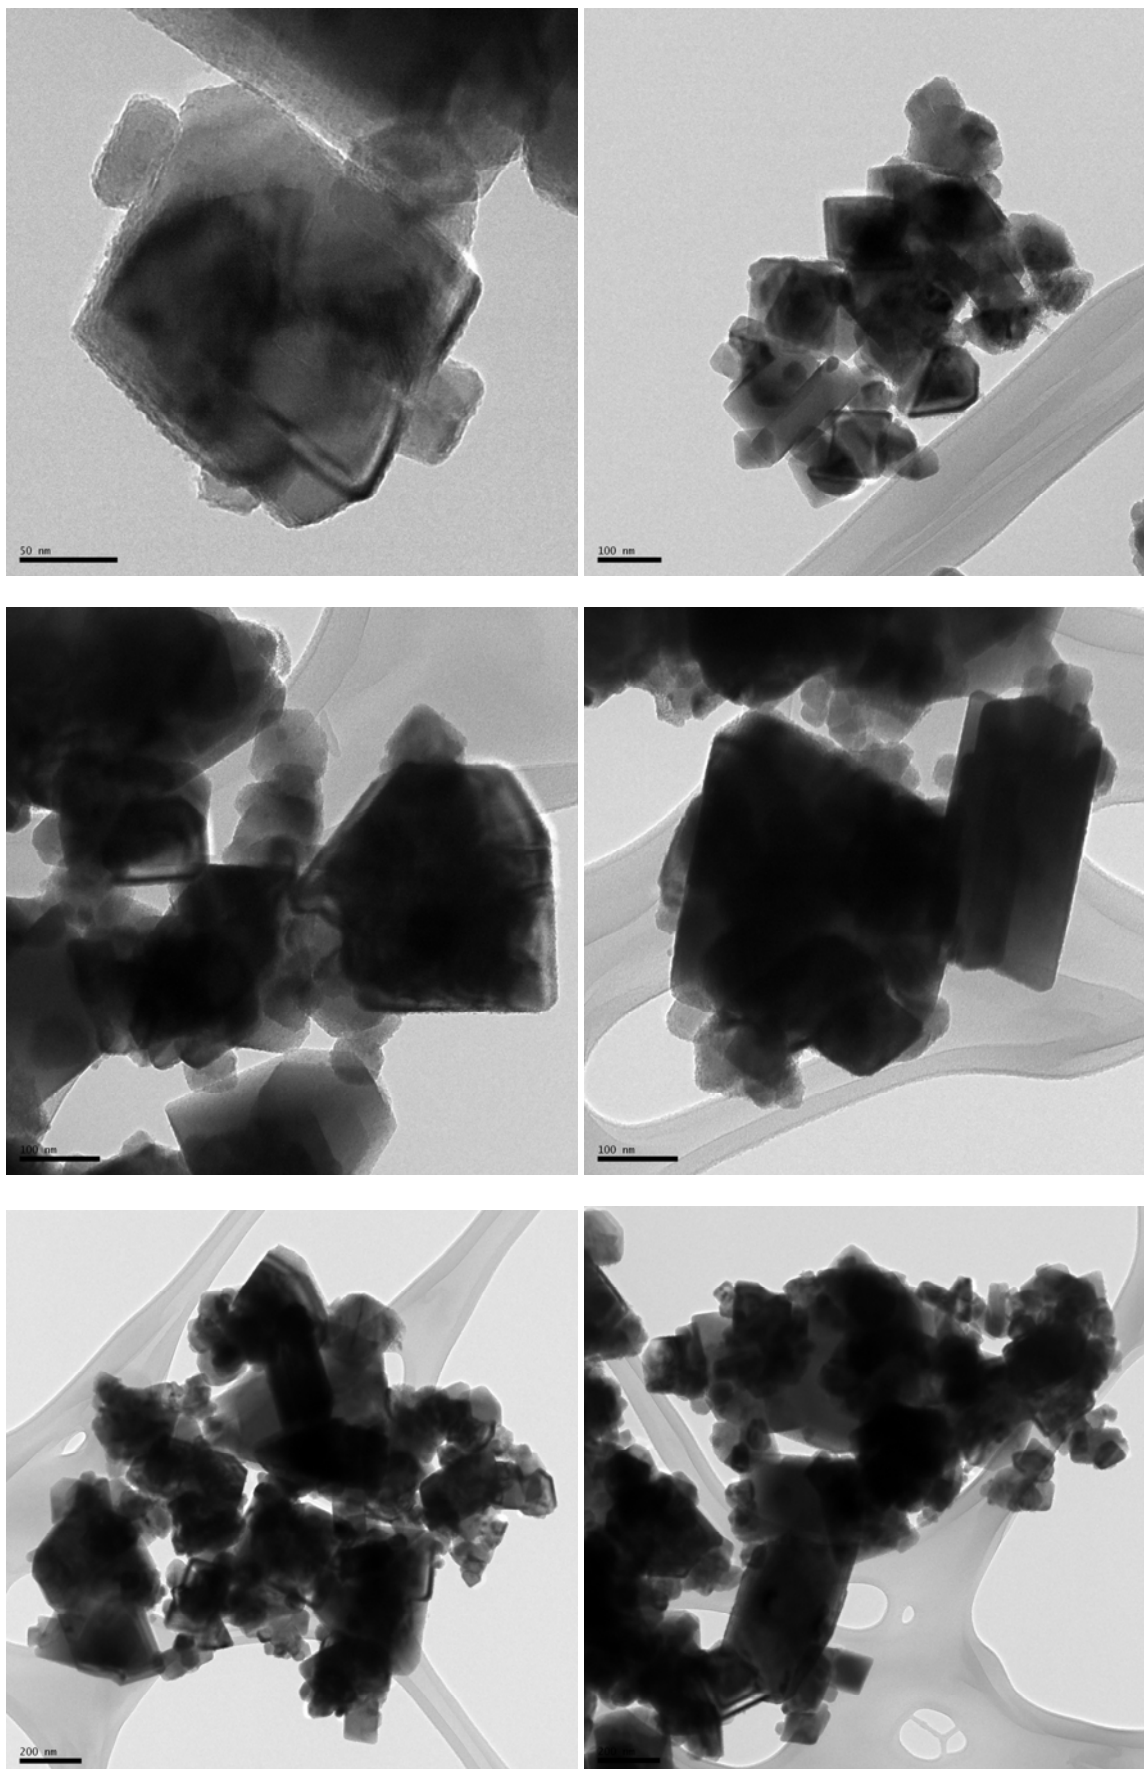

# <sup>1</sup>H-NMR

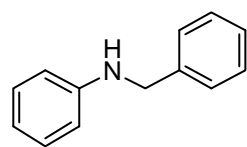

**3a**

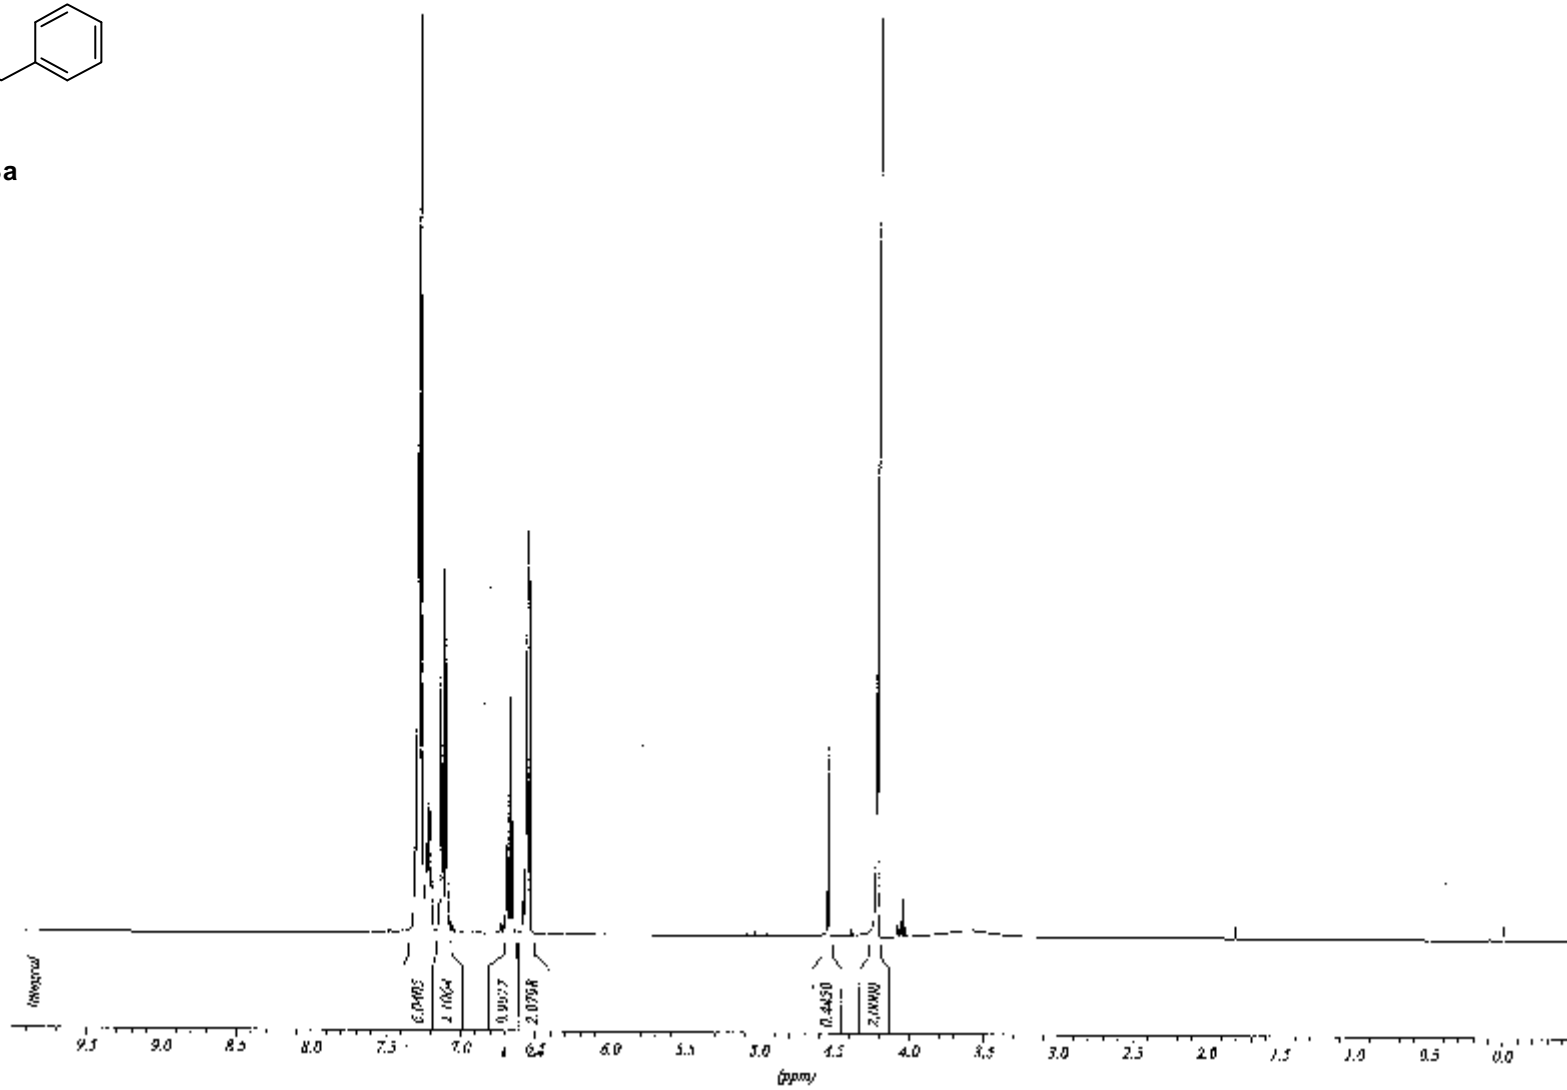

# $^{13}\text{C}$ -NMR

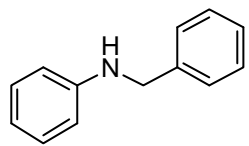

**3a**

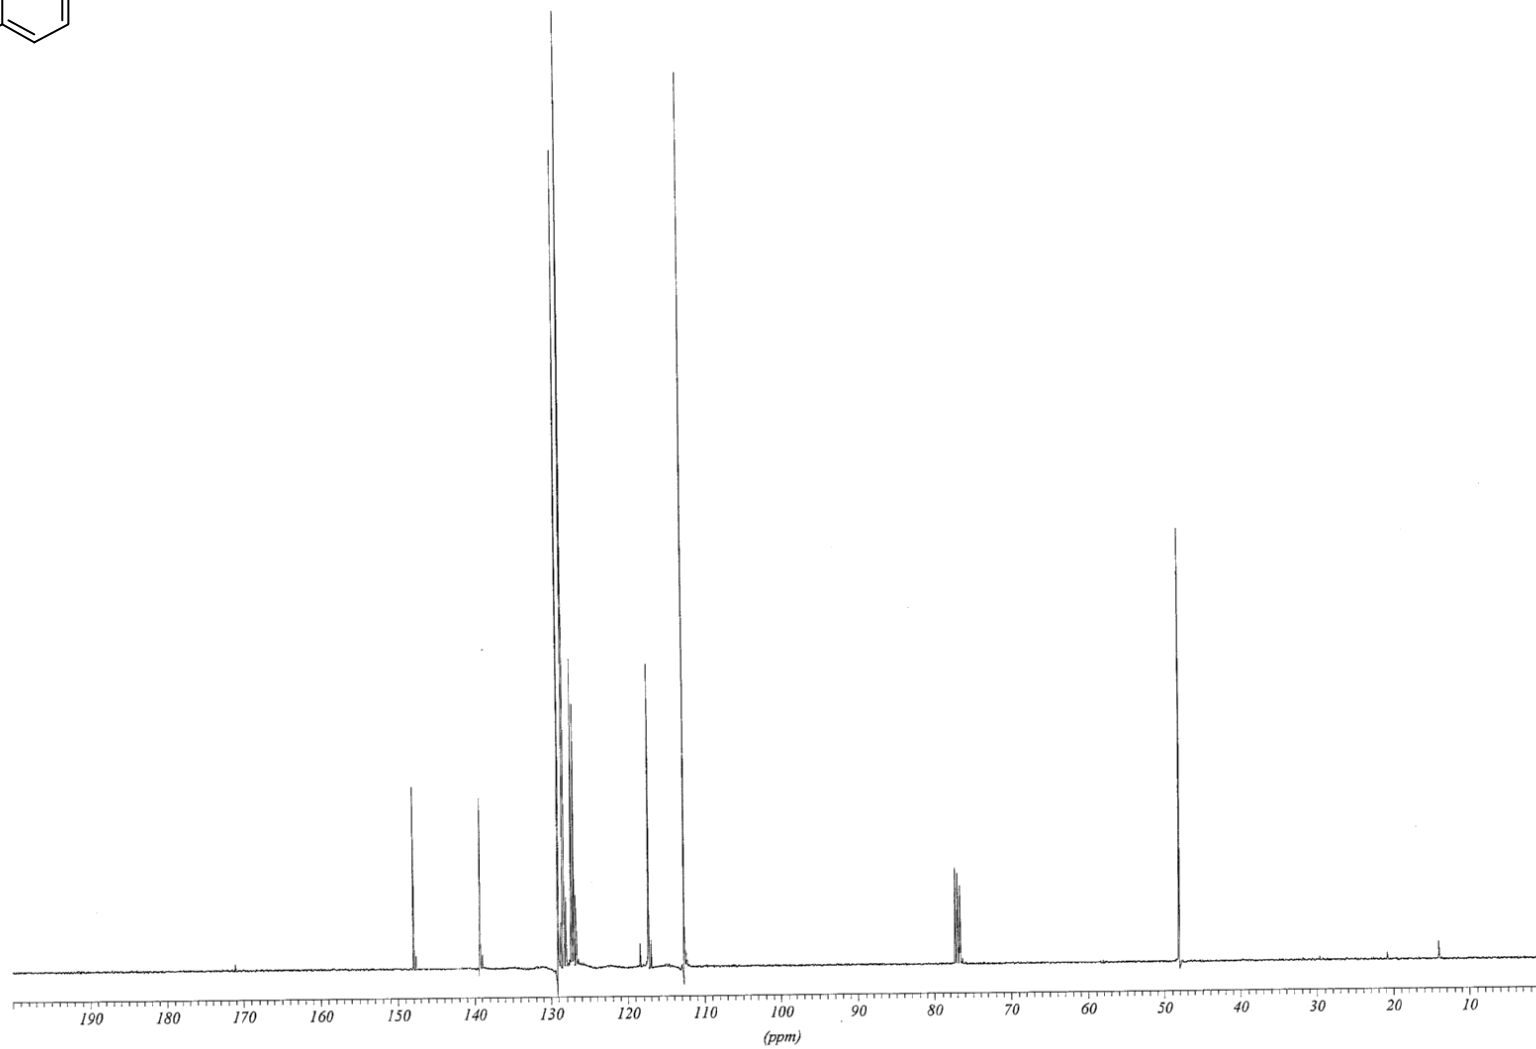

# <sup>1</sup>H-NMR

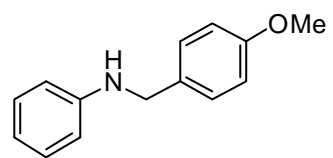

**3b**

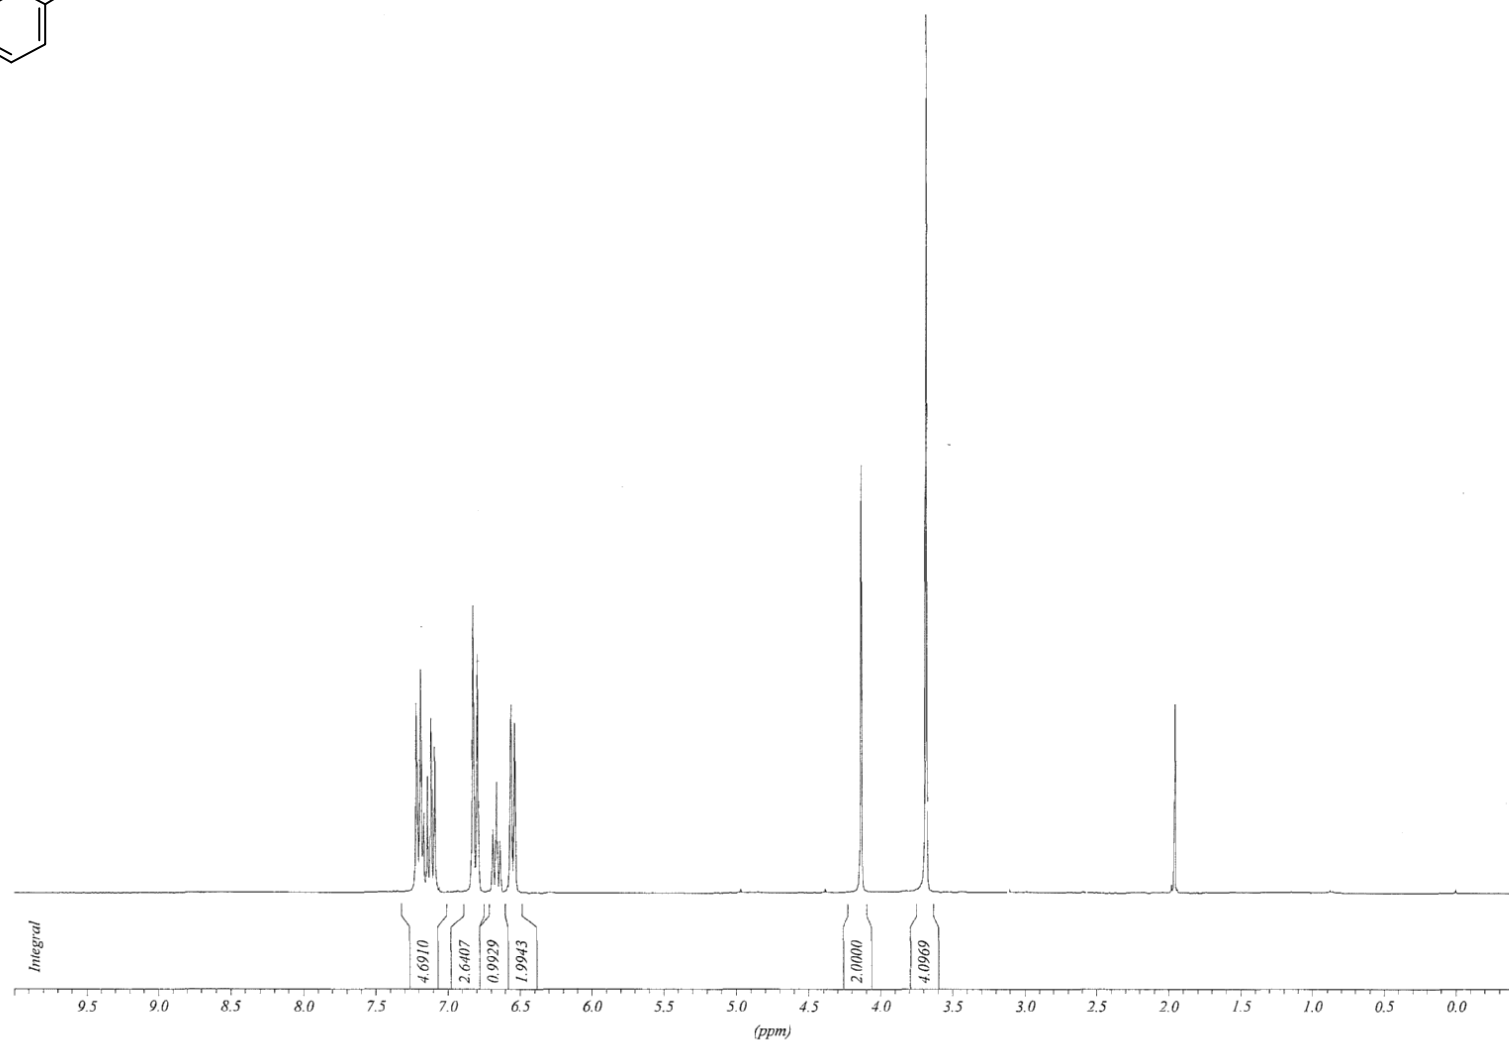

**$^{13}\text{C-NMR}$**

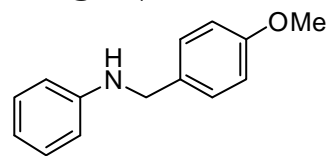

**3b**

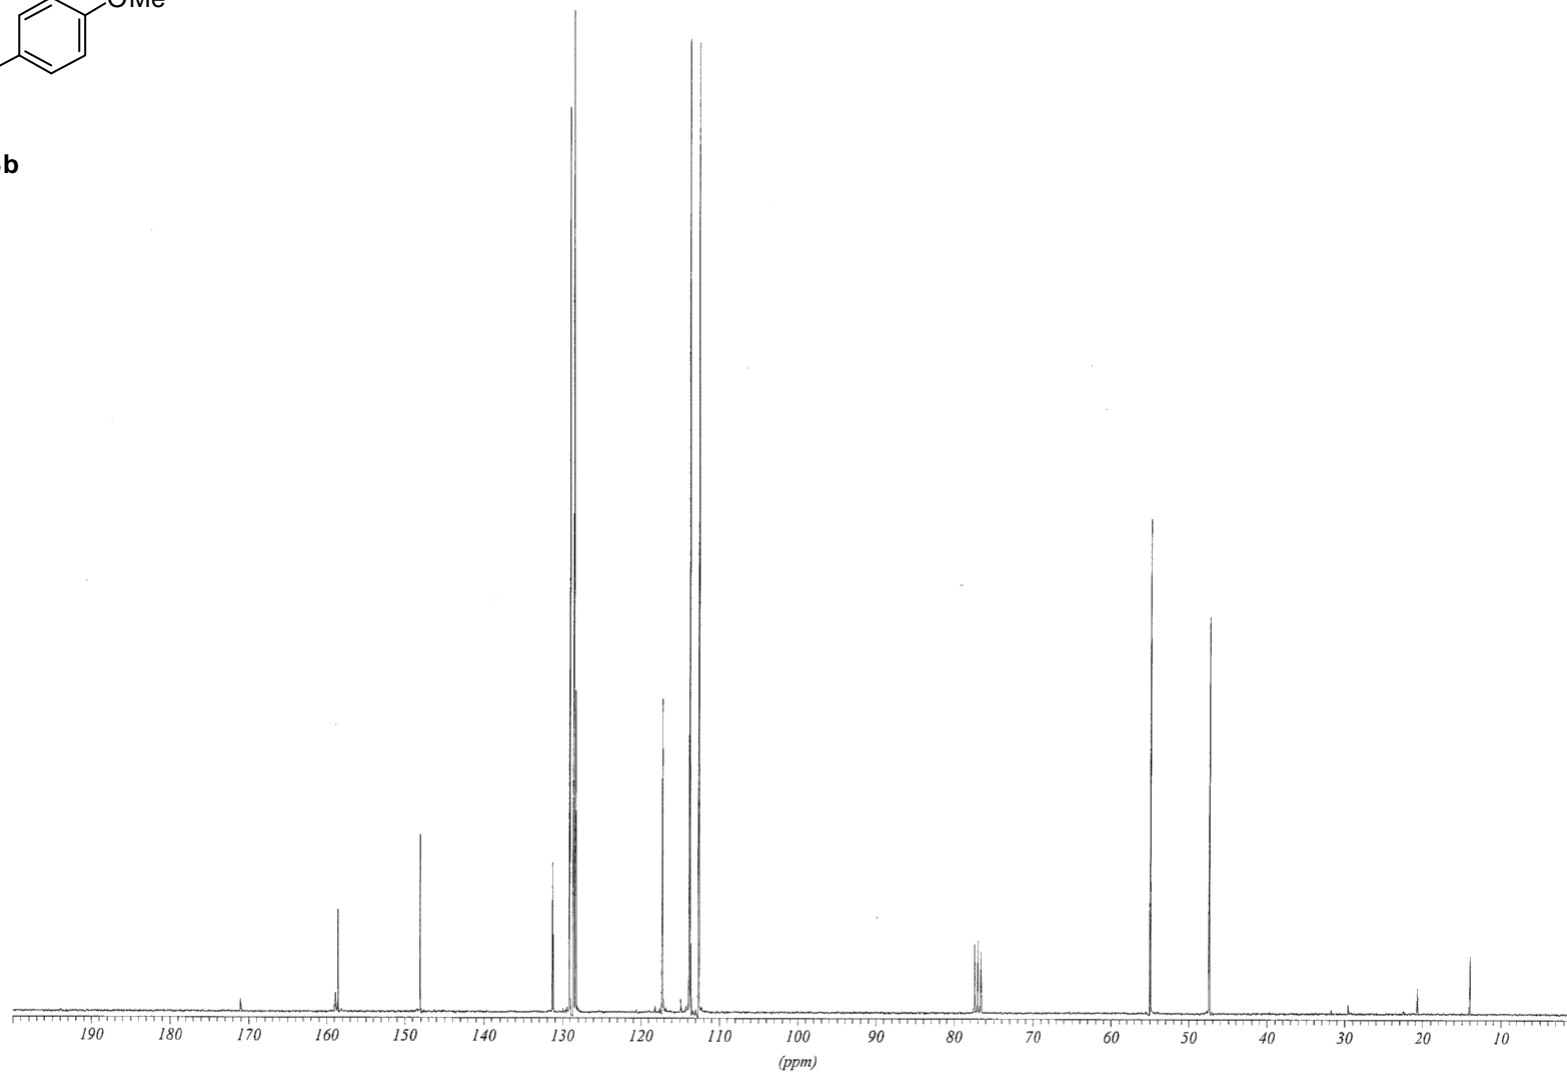

# <sup>1</sup>H-NMR

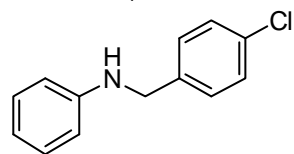

3c

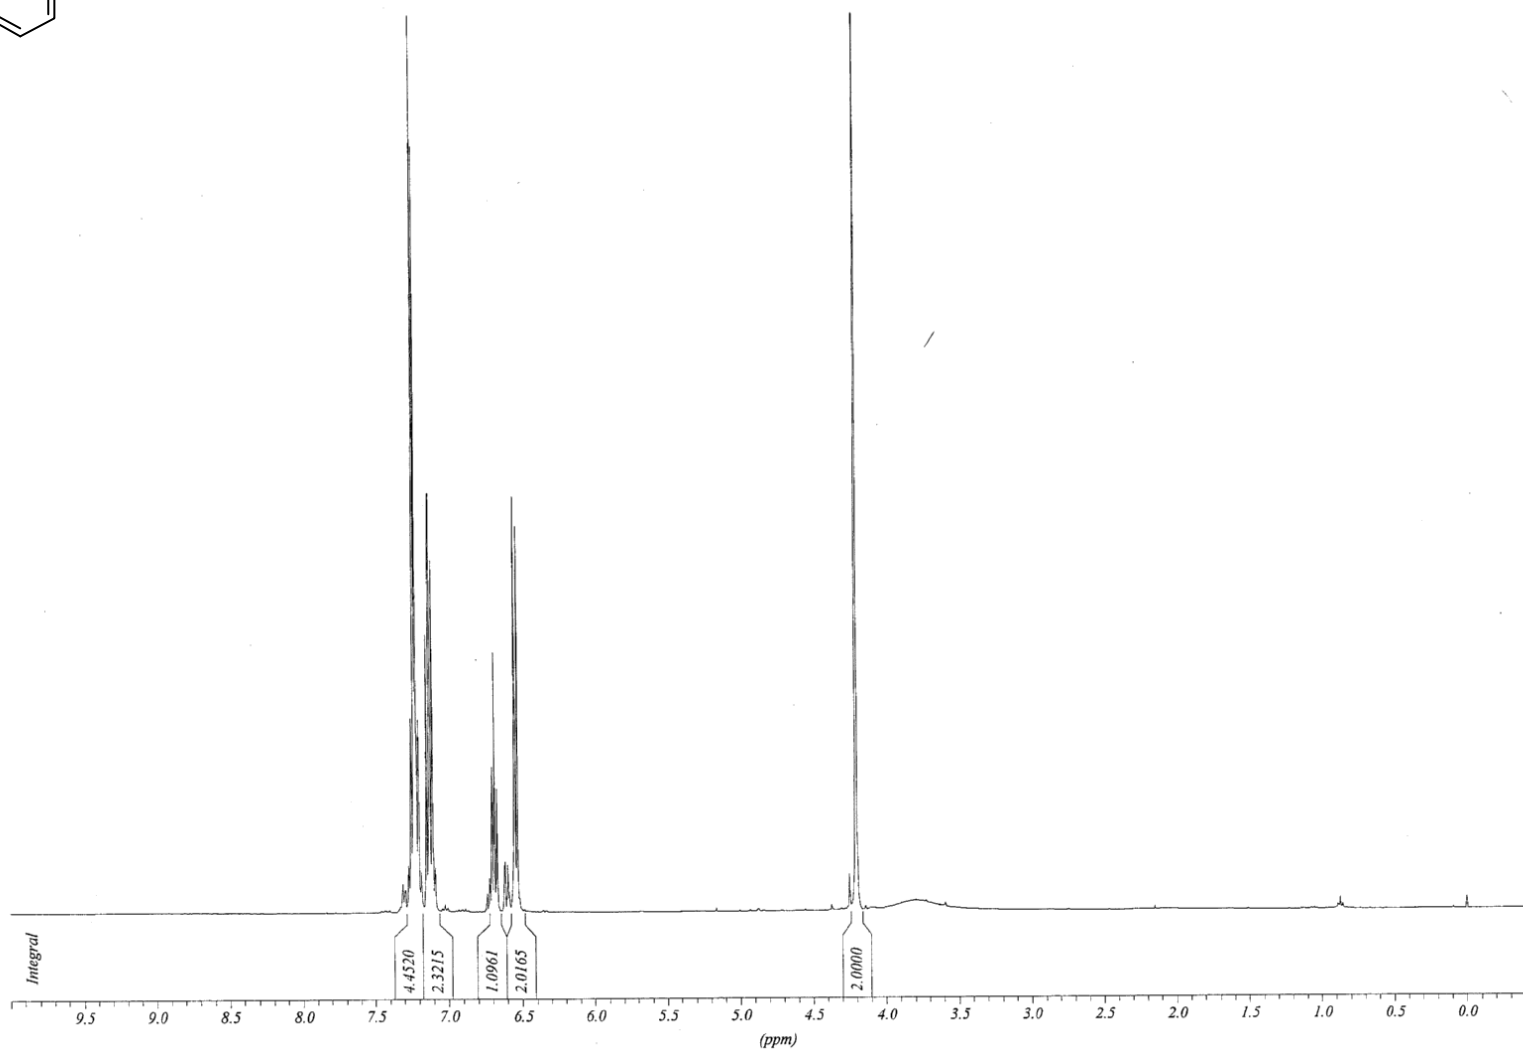



**$^{13}\text{C}$ -NMR**

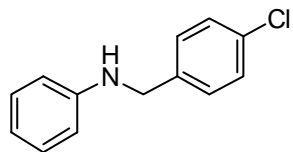

**3c**

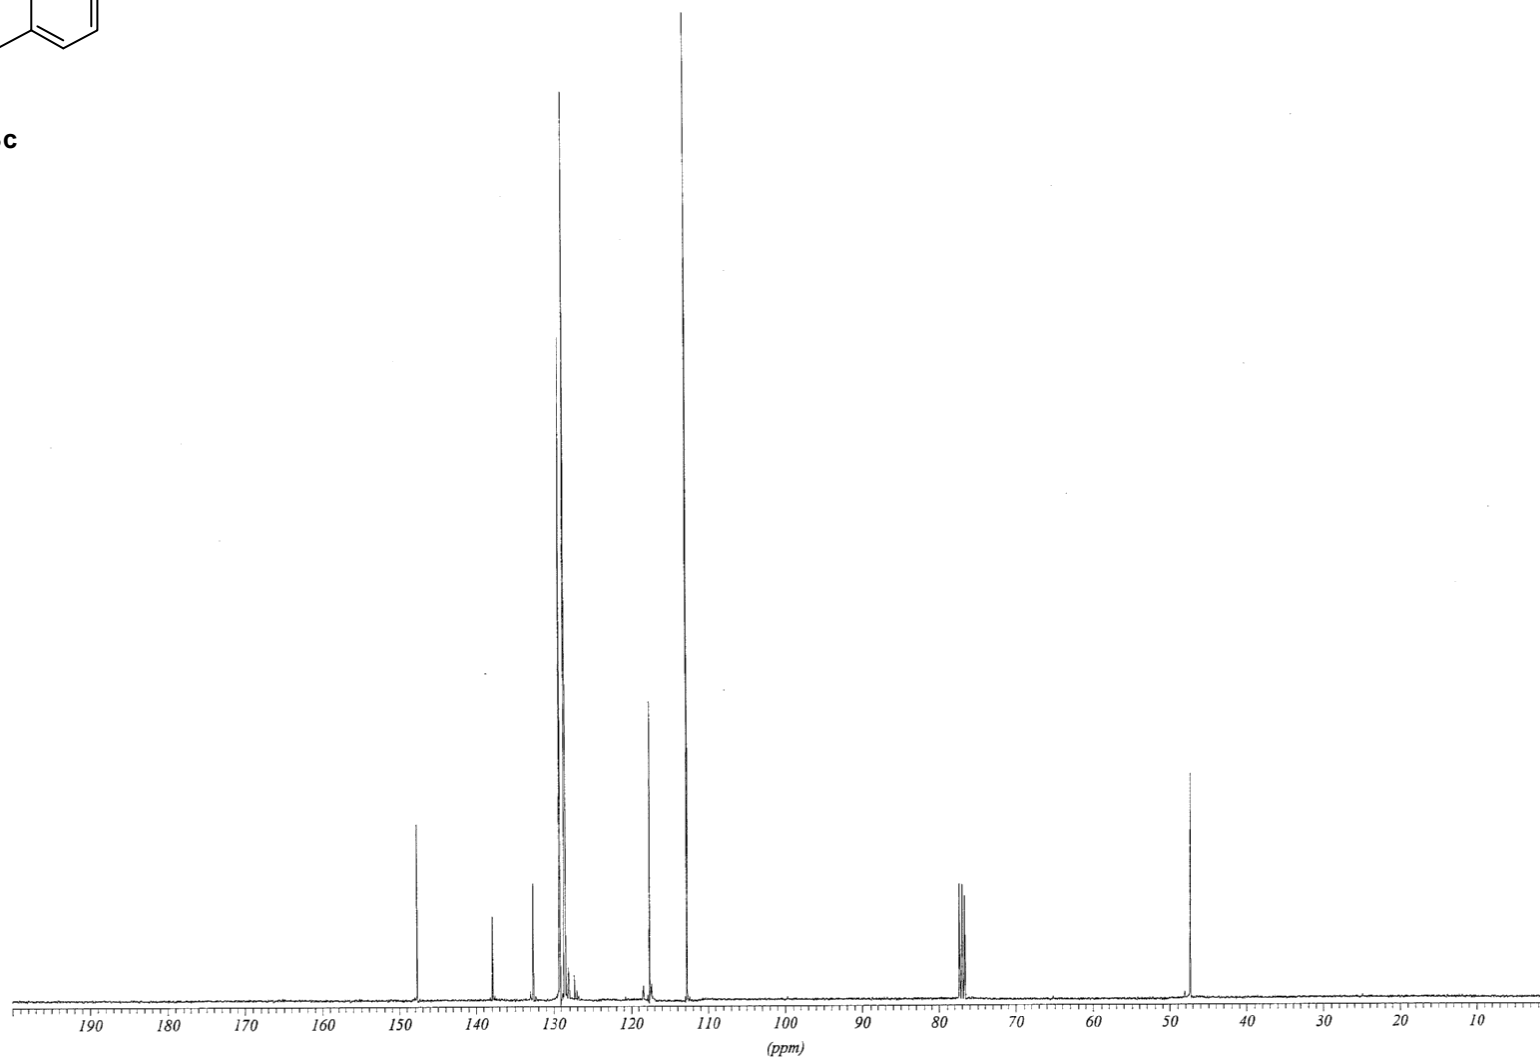

# <sup>1</sup>H-NMR

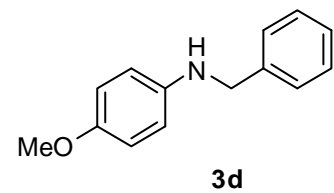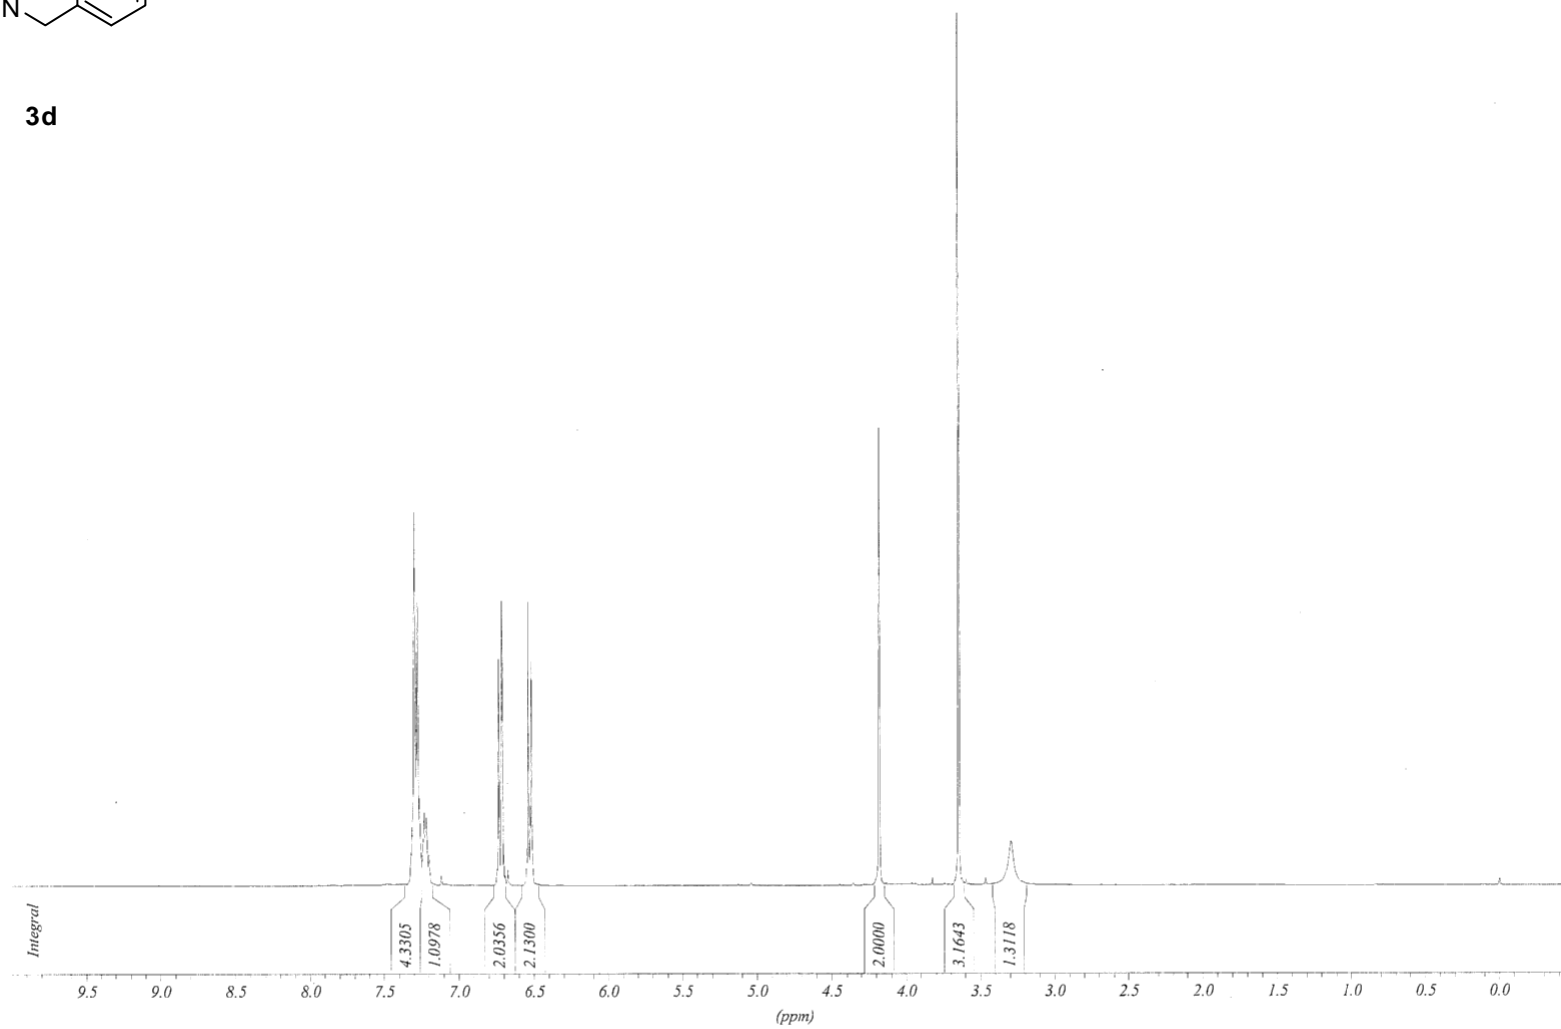

# <sup>13</sup>C-NMR

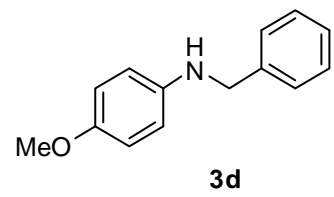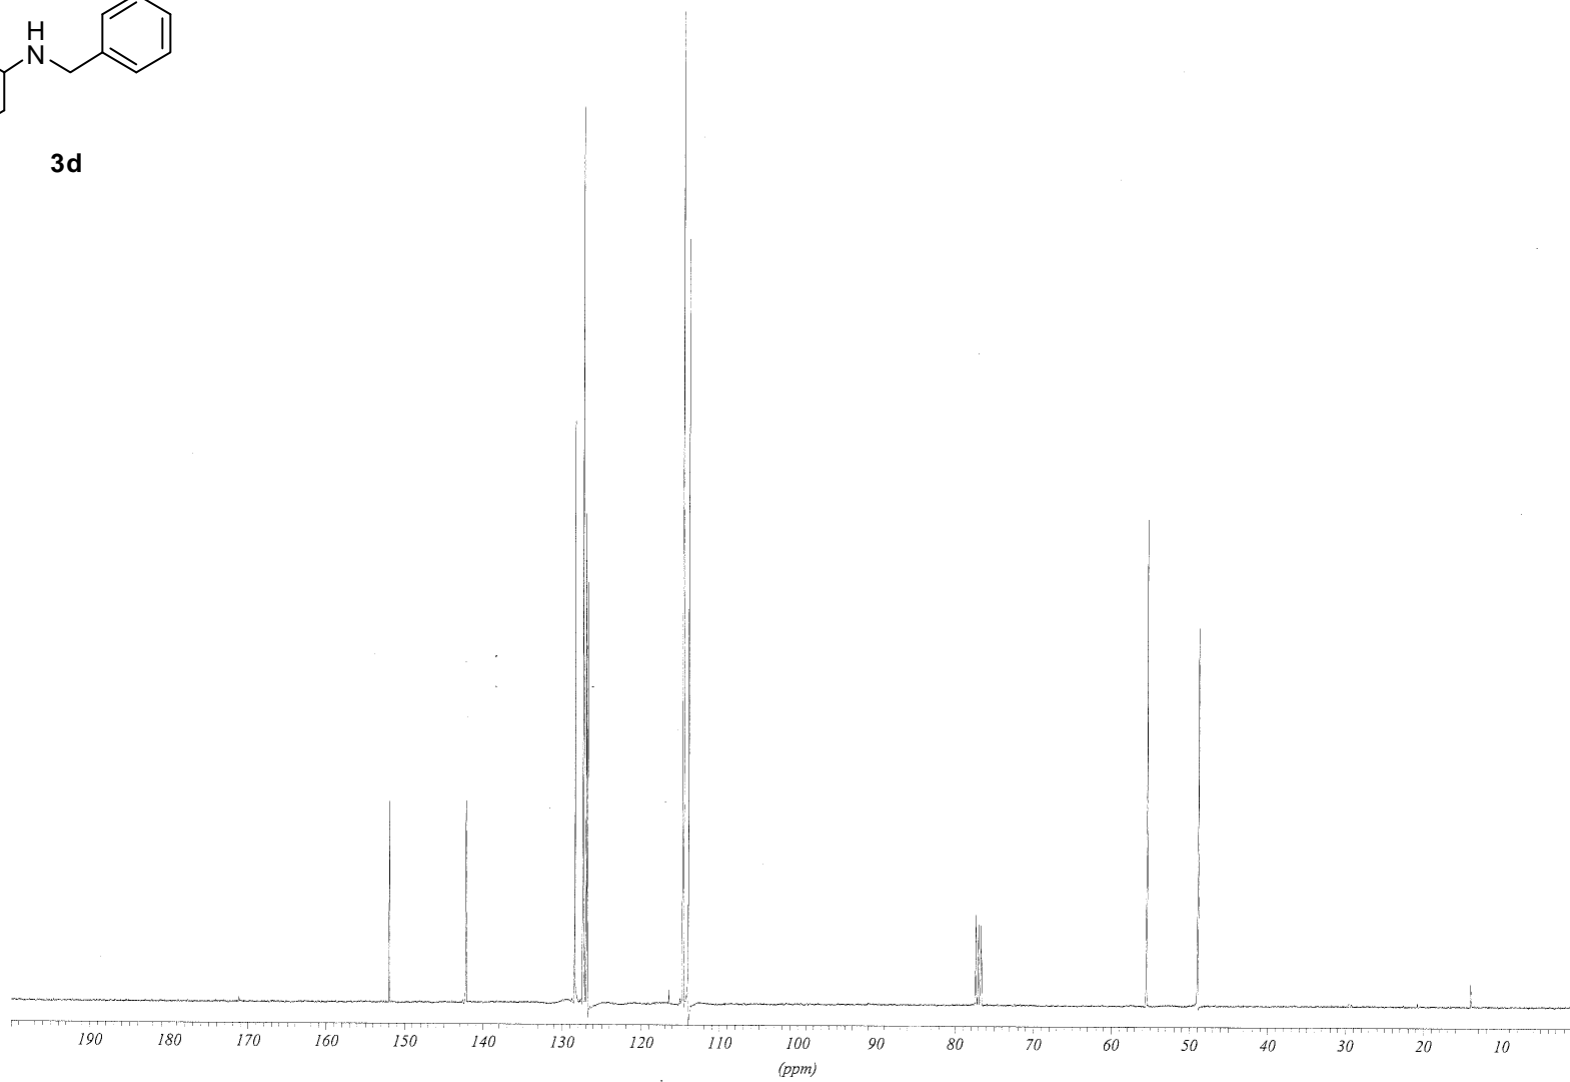

# <sup>1</sup>H-NMR

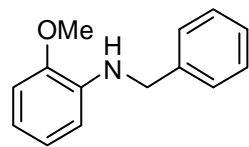

**3e**

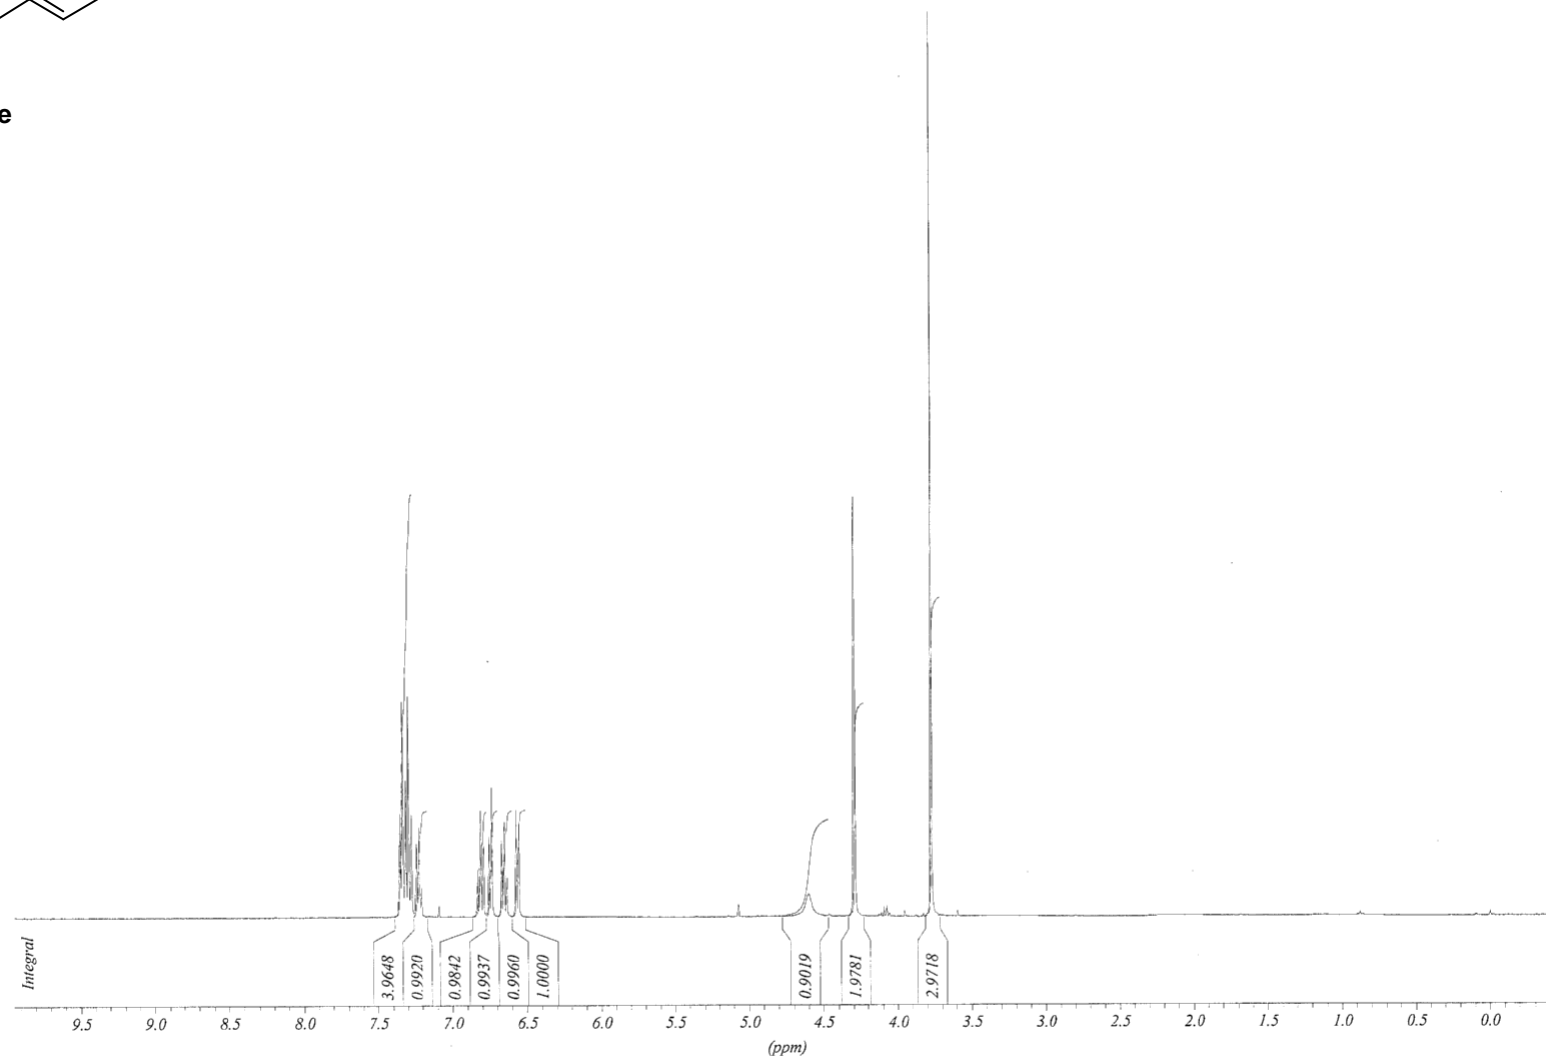

# $^{13}\text{C}$ -NMR

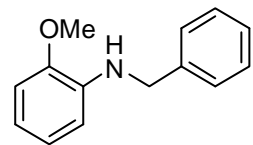

**3e**

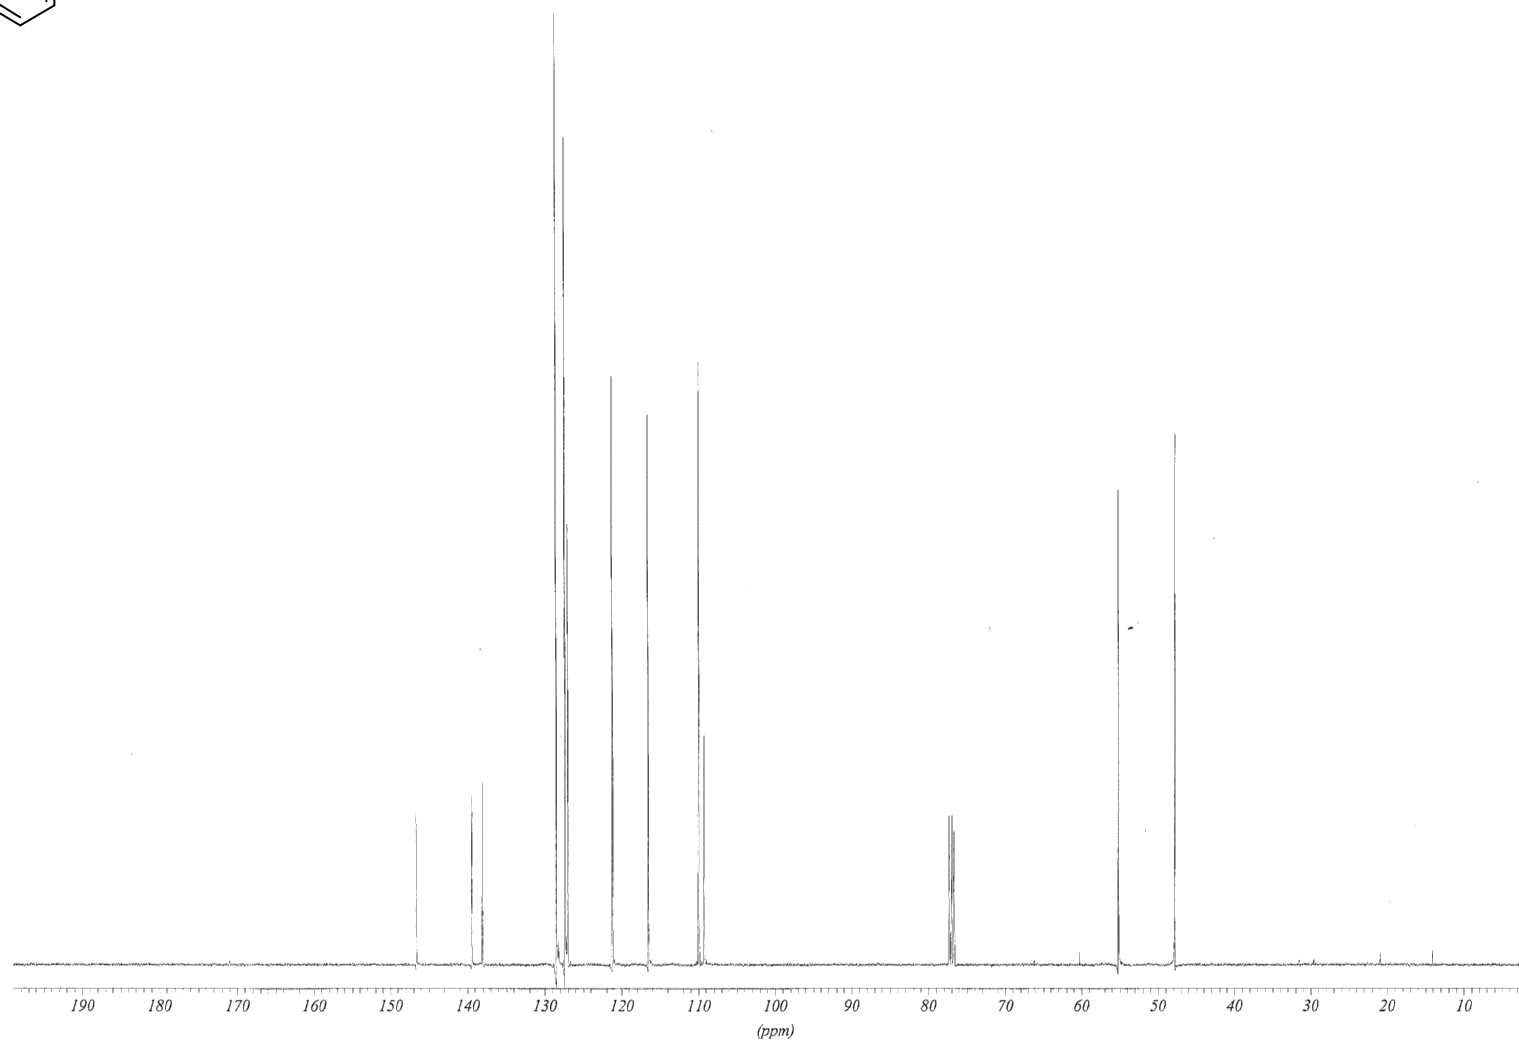

# <sup>1</sup>H-NMR

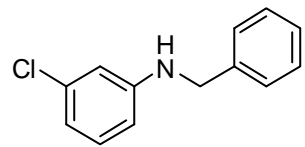

3f

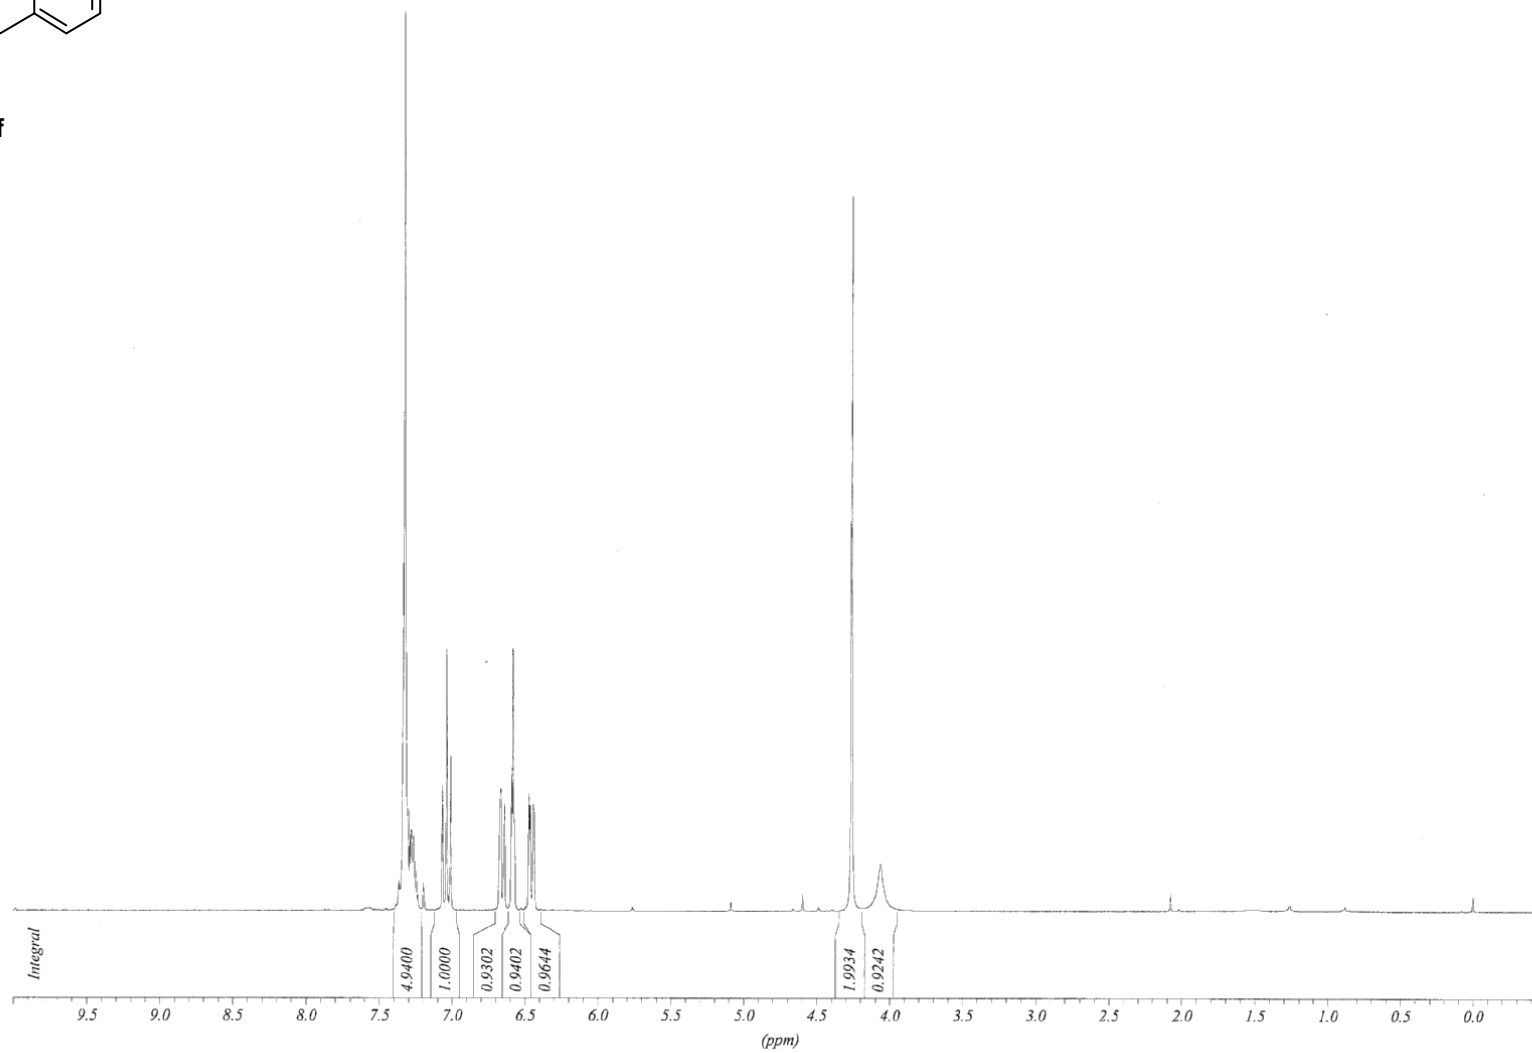

# <sup>13</sup>C-NMR

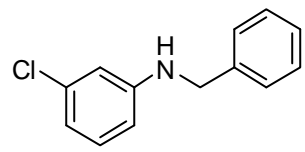

3f

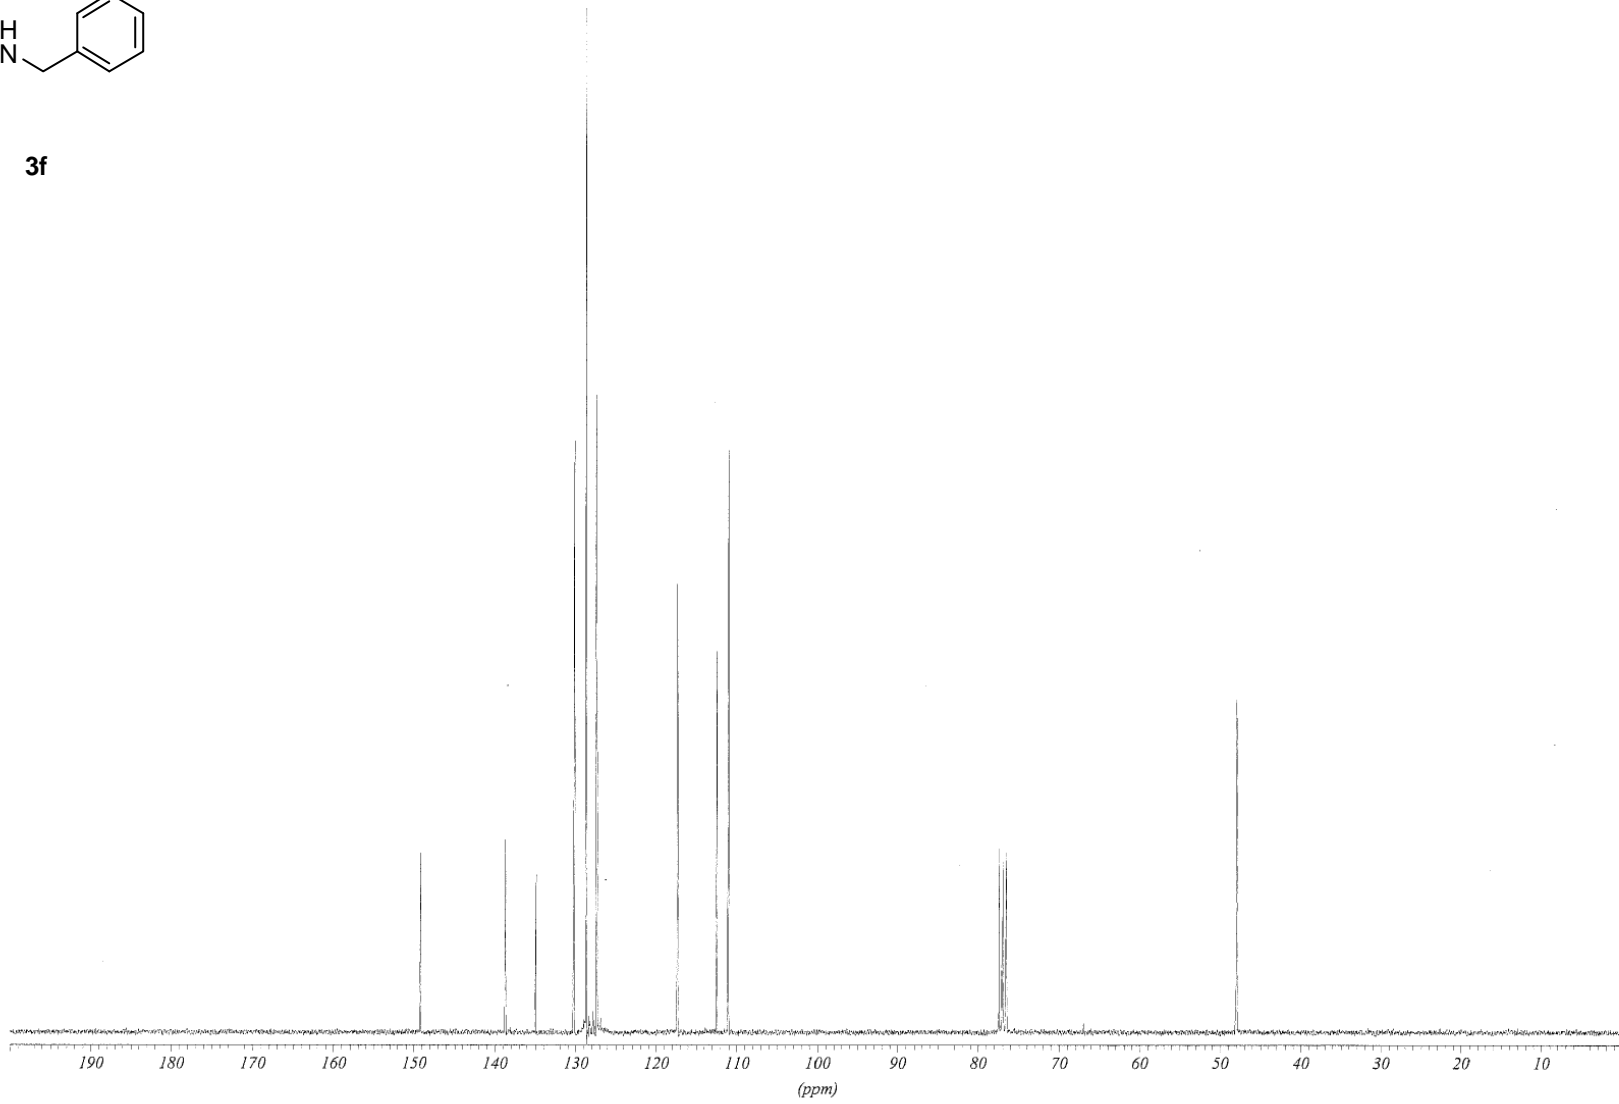

# <sup>1</sup>H-NMR

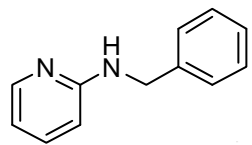

3g

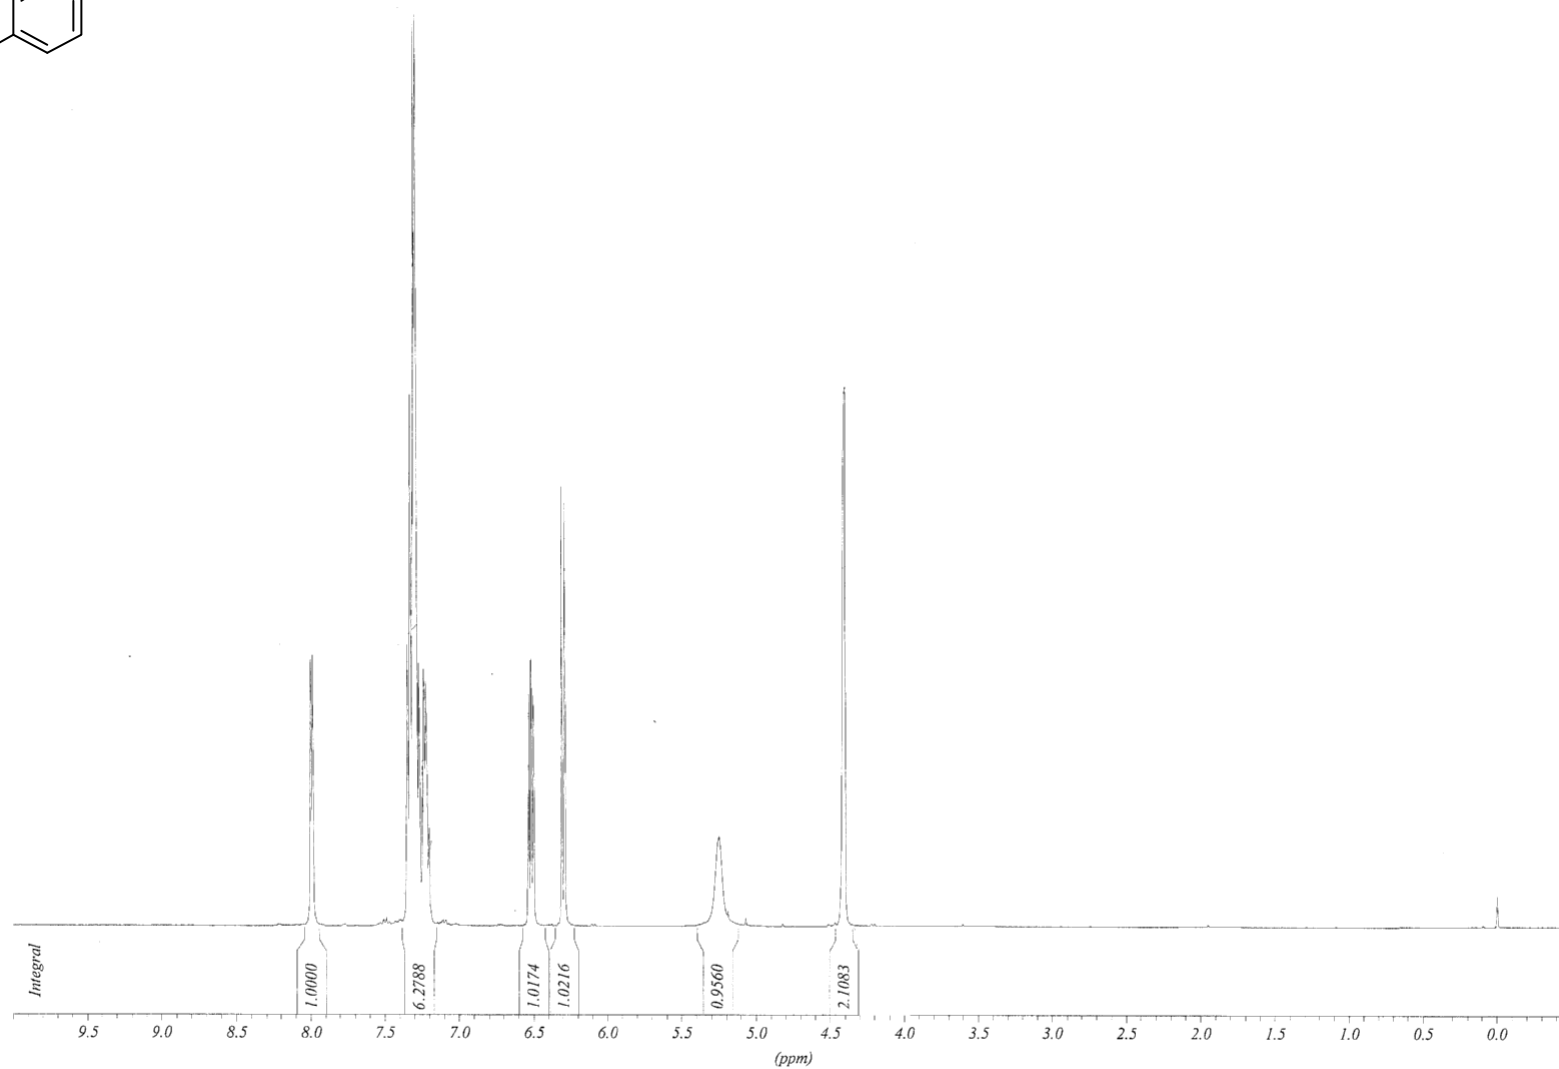



# <sup>13</sup>C-NMR

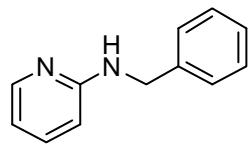

**3g**

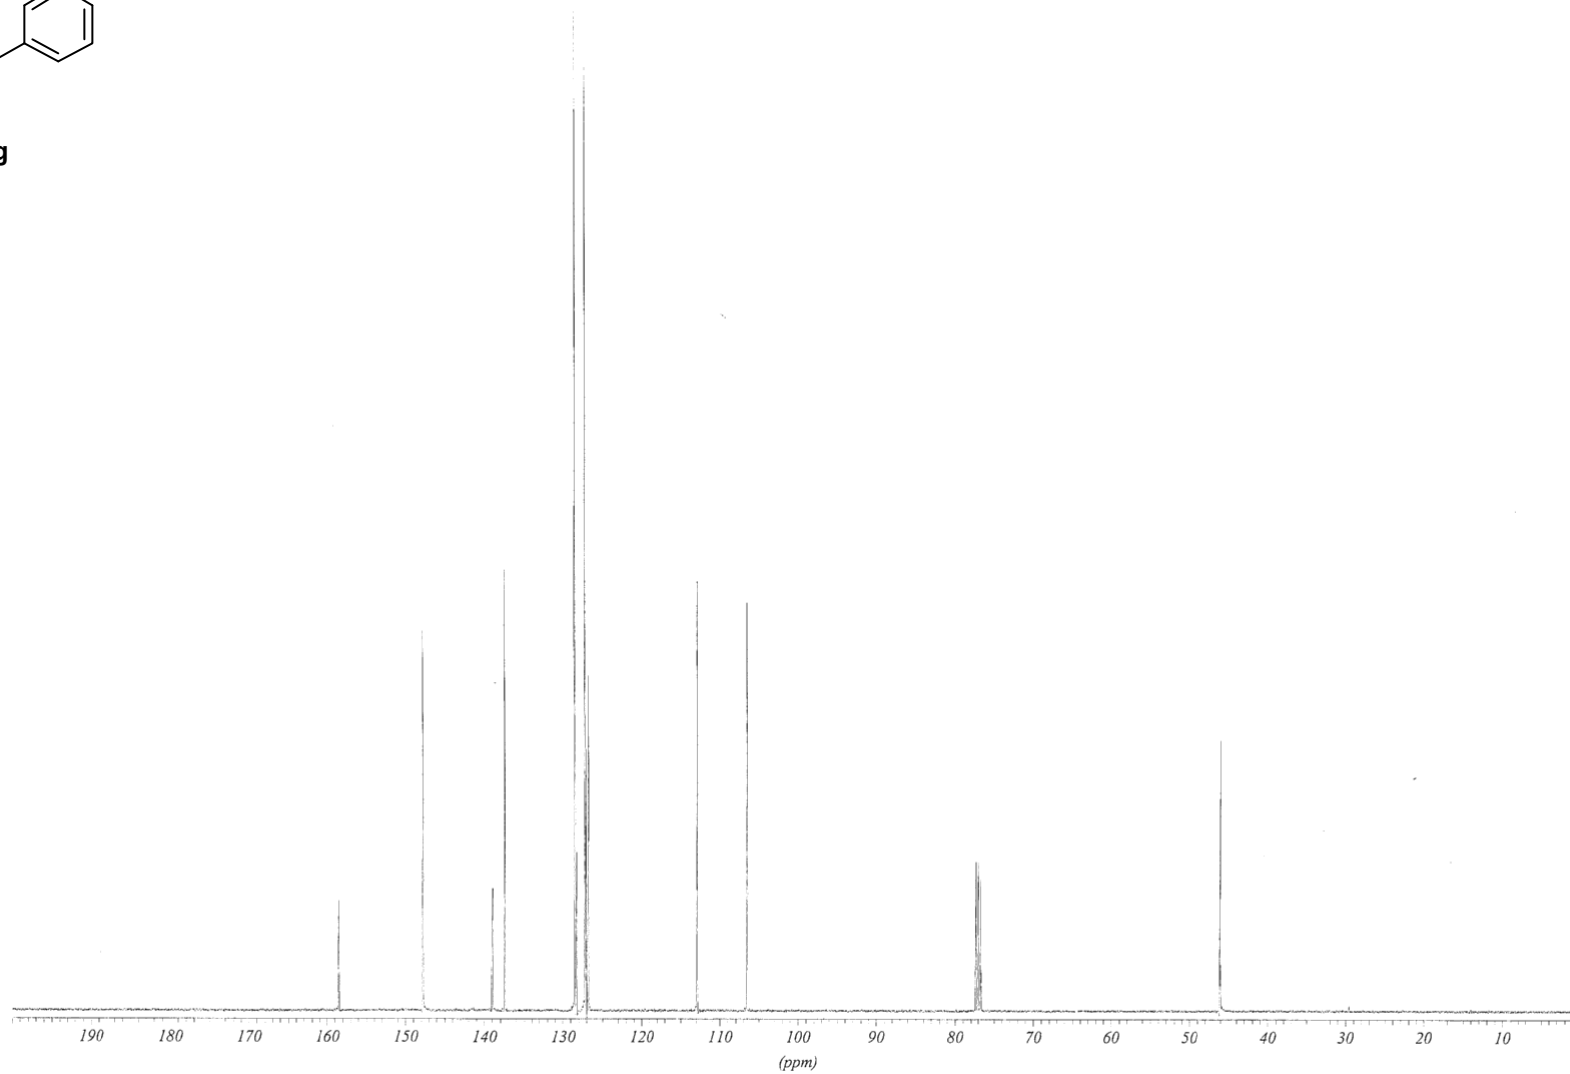

# <sup>1</sup>H-NMR

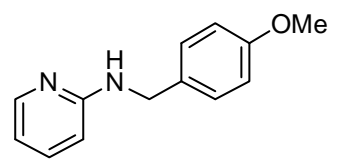

3h

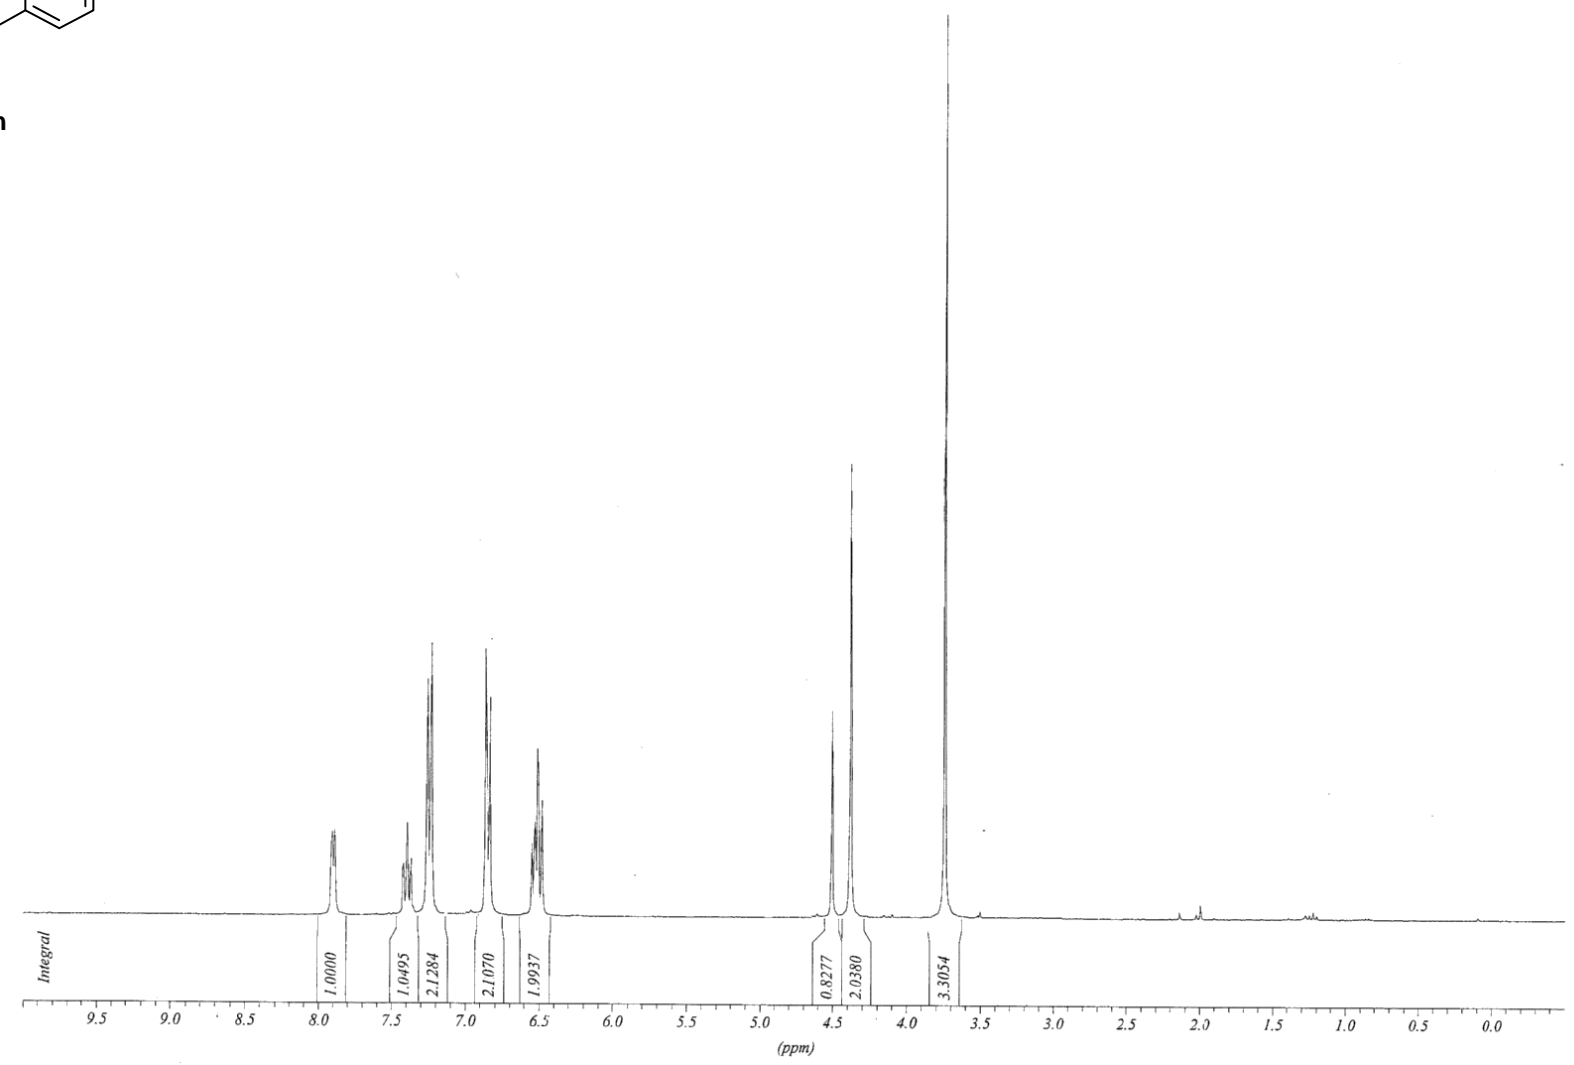

**$^{13}\text{C-NMR}$**

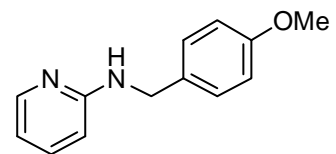

**3h**

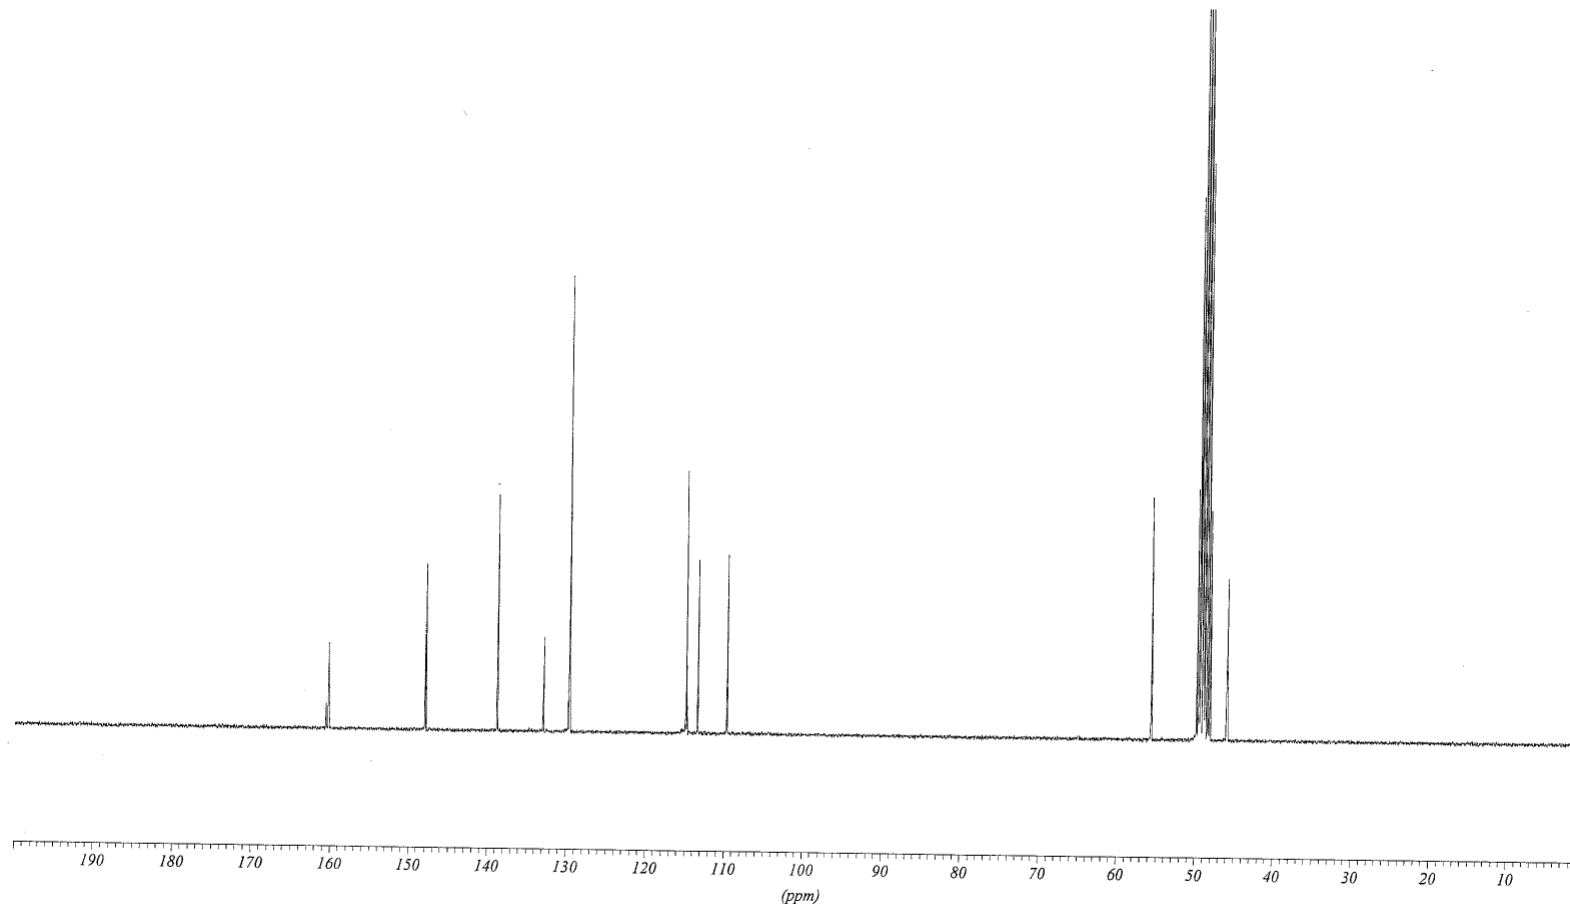

# <sup>1</sup>H-NMR

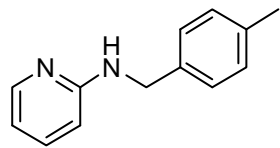

**3i**

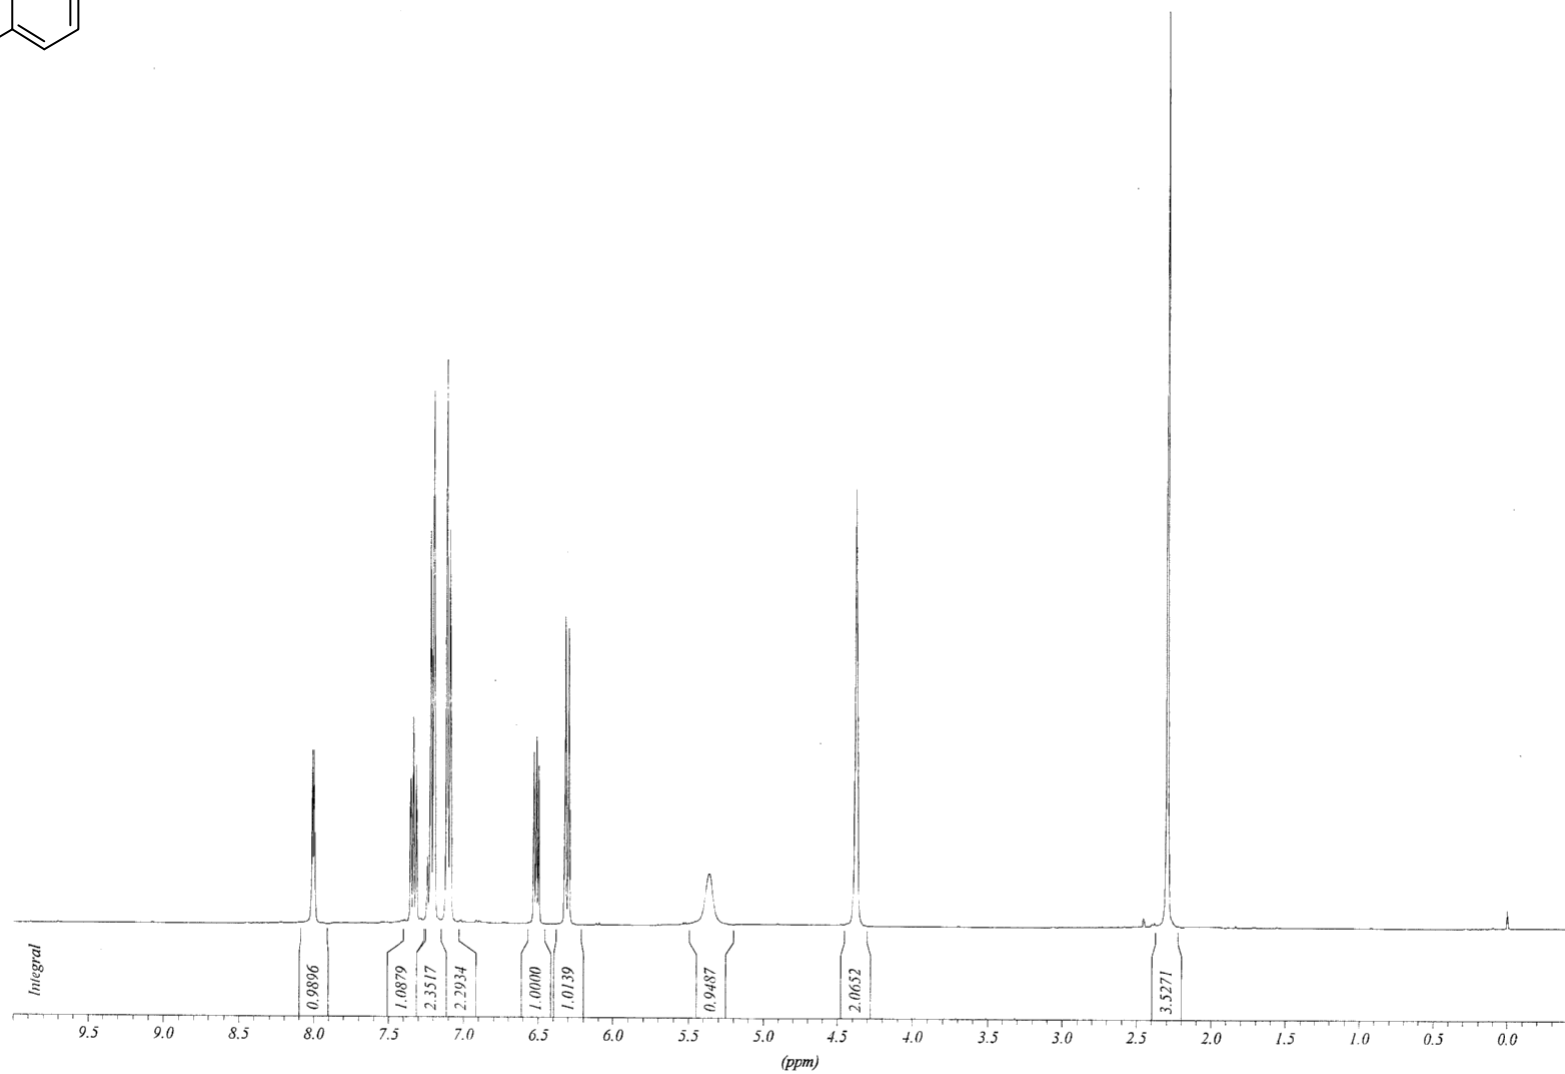

# $^{13}\text{C}$ -NMR

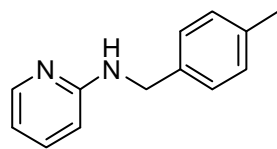

**3i**

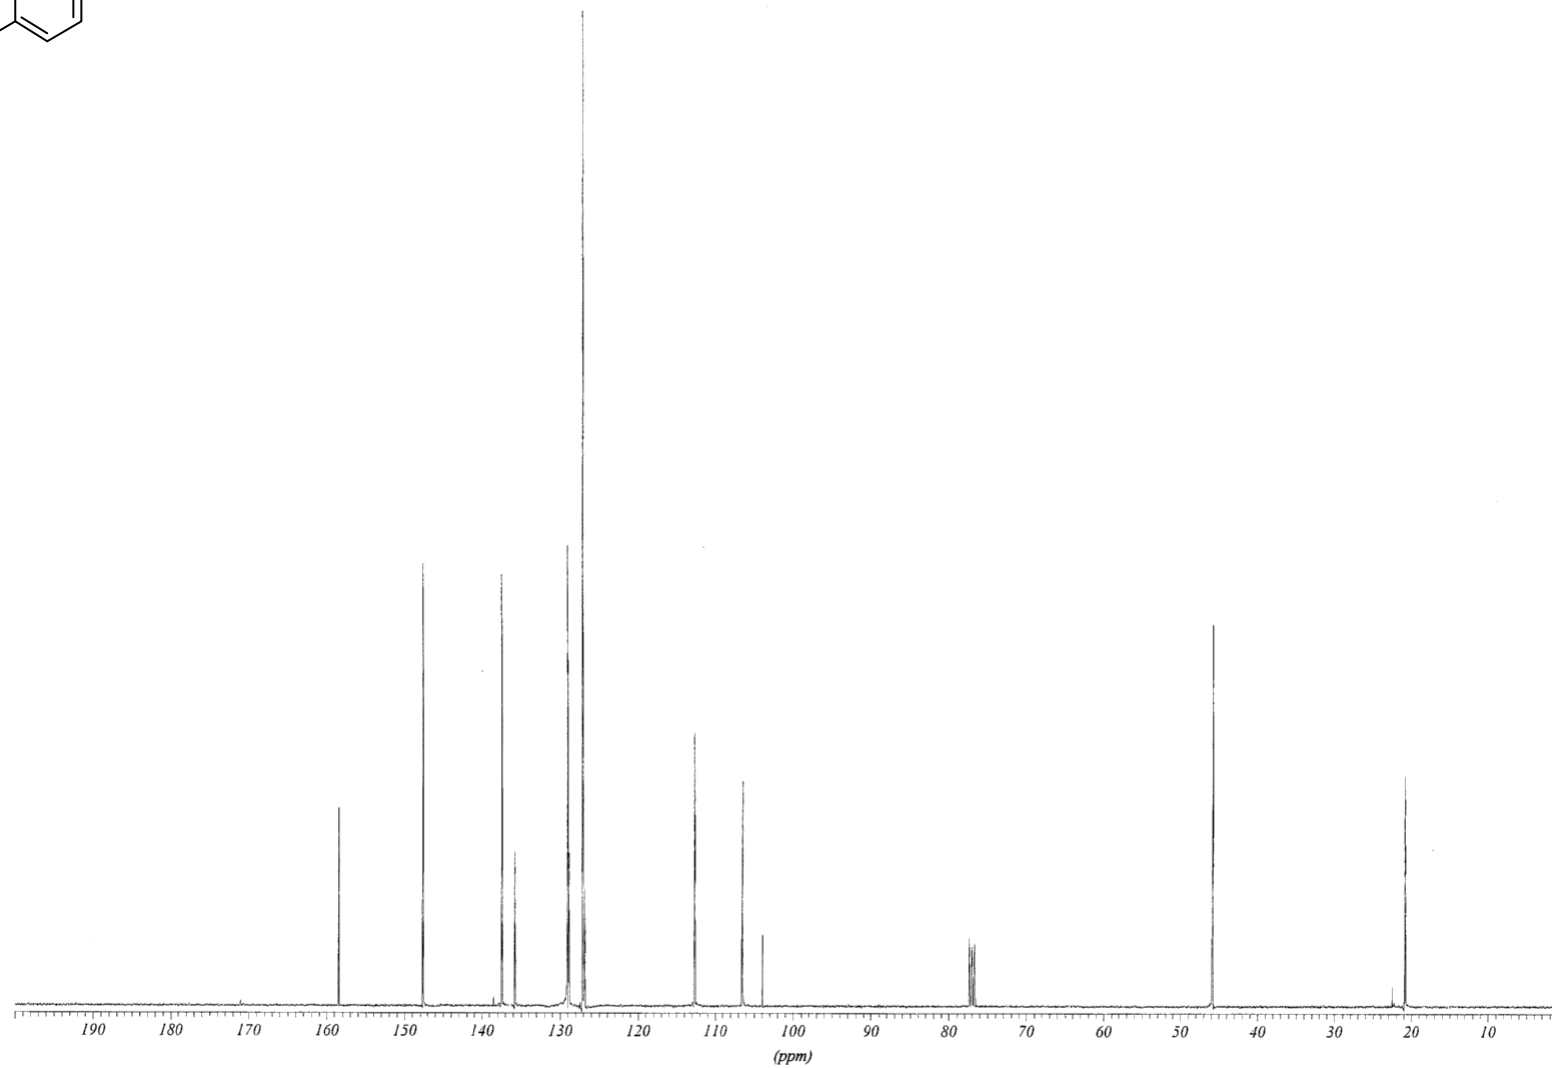

# <sup>1</sup>H-NMR

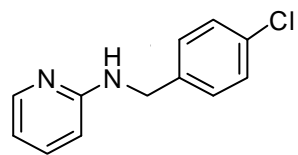

3j

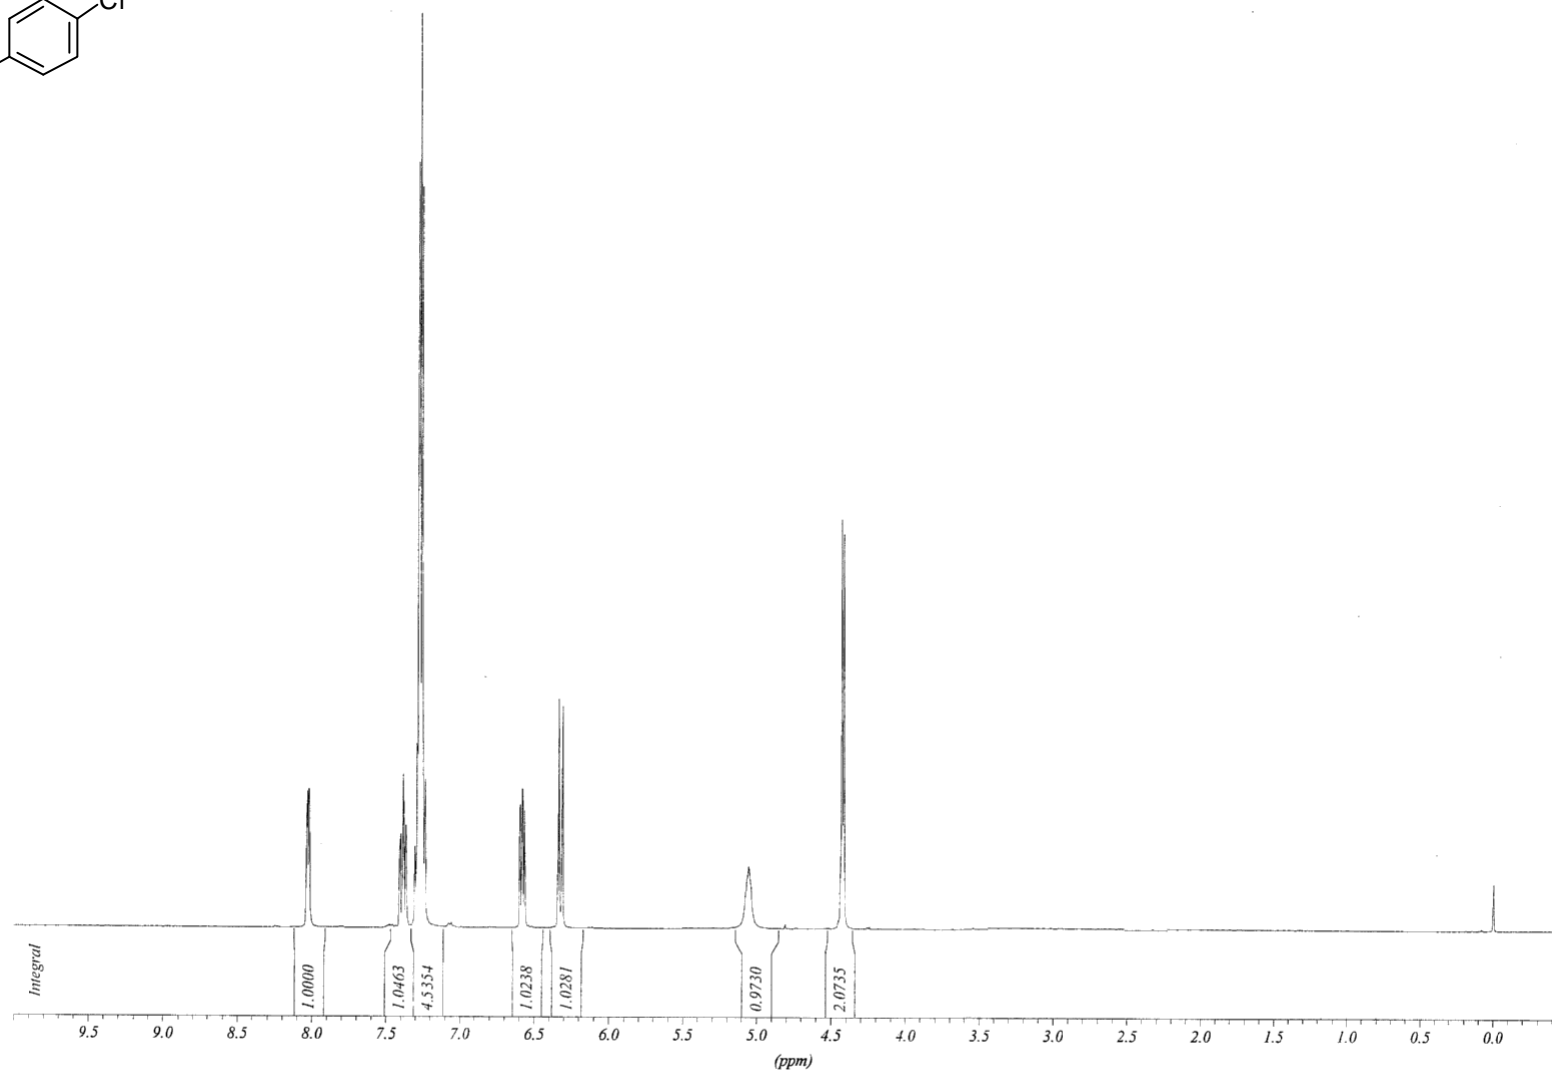

# <sup>13</sup>C-NMR

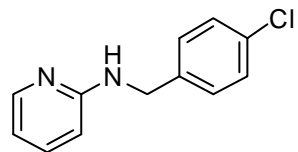

3j

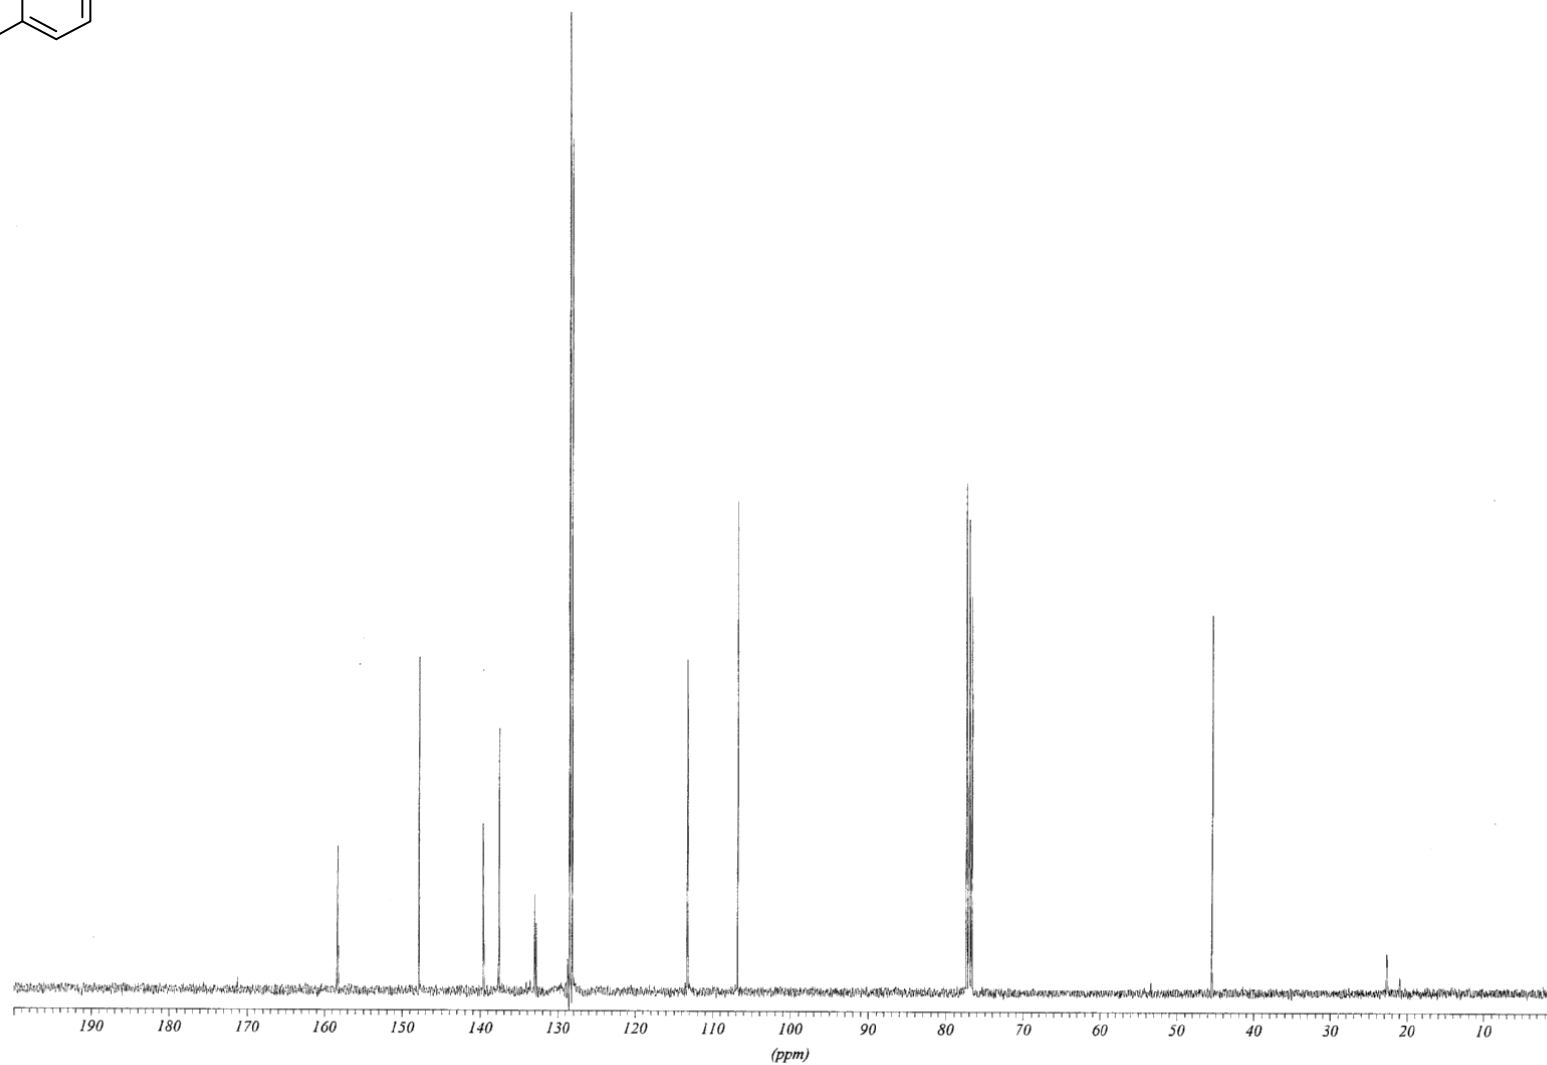

# <sup>1</sup>H-NMR

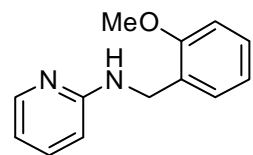

**3k**

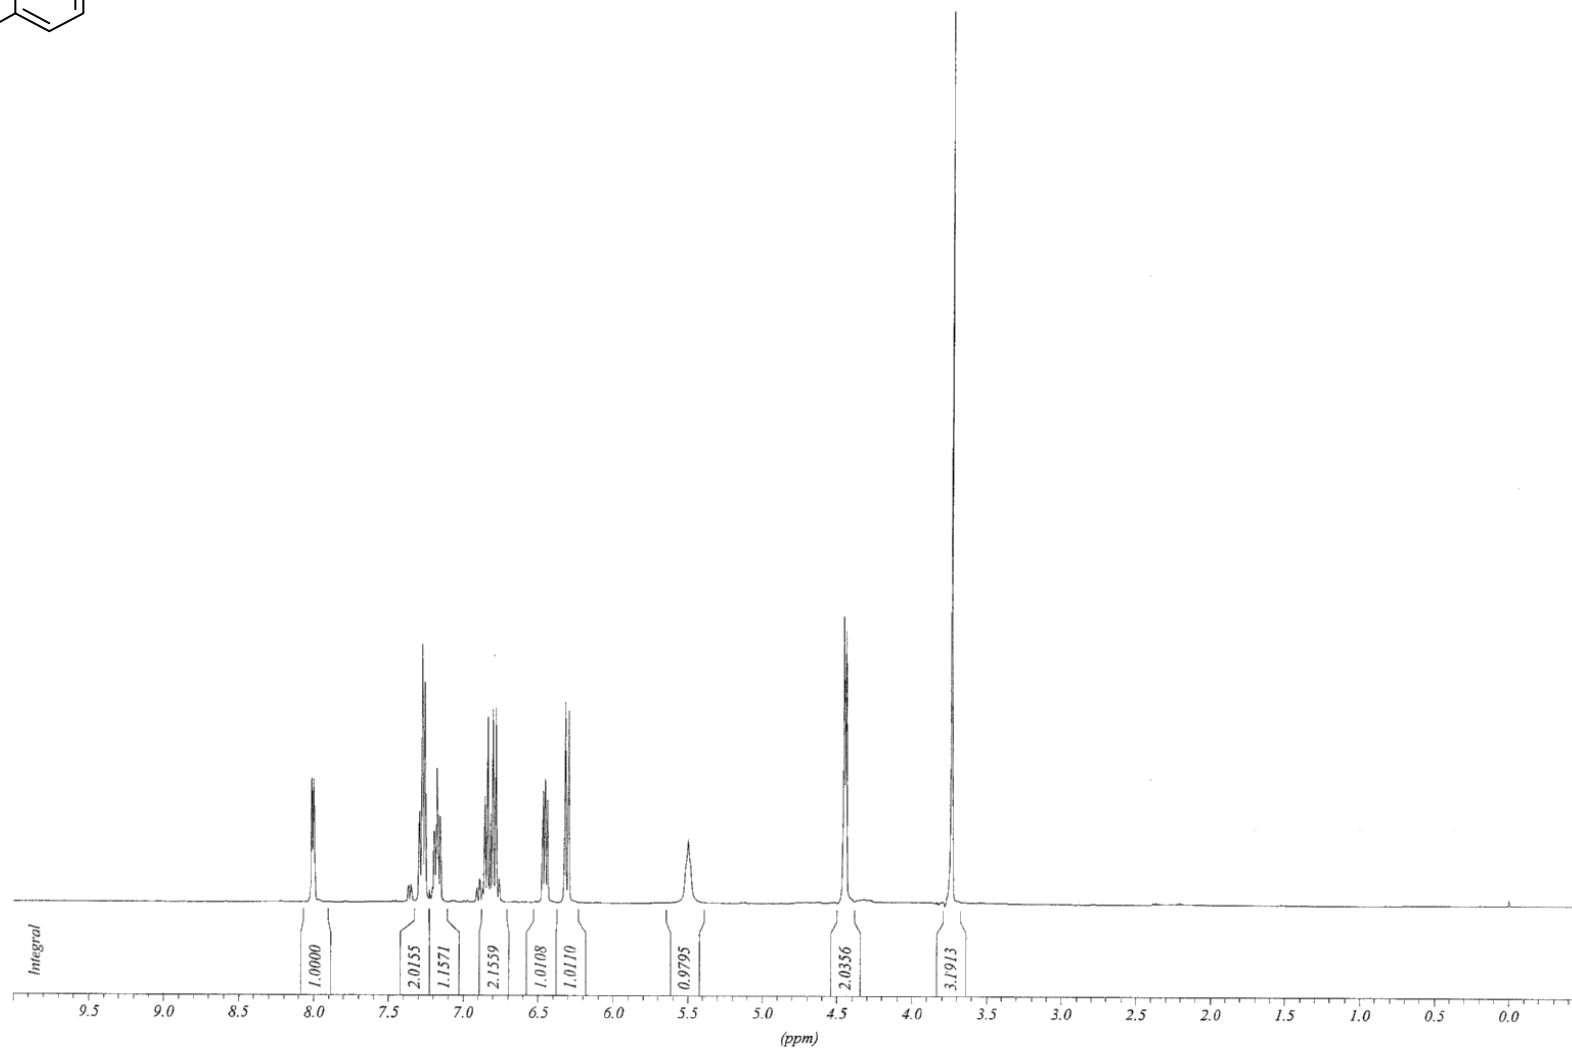



# $^{13}\text{C}$ -NMR

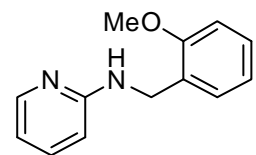

**3k**

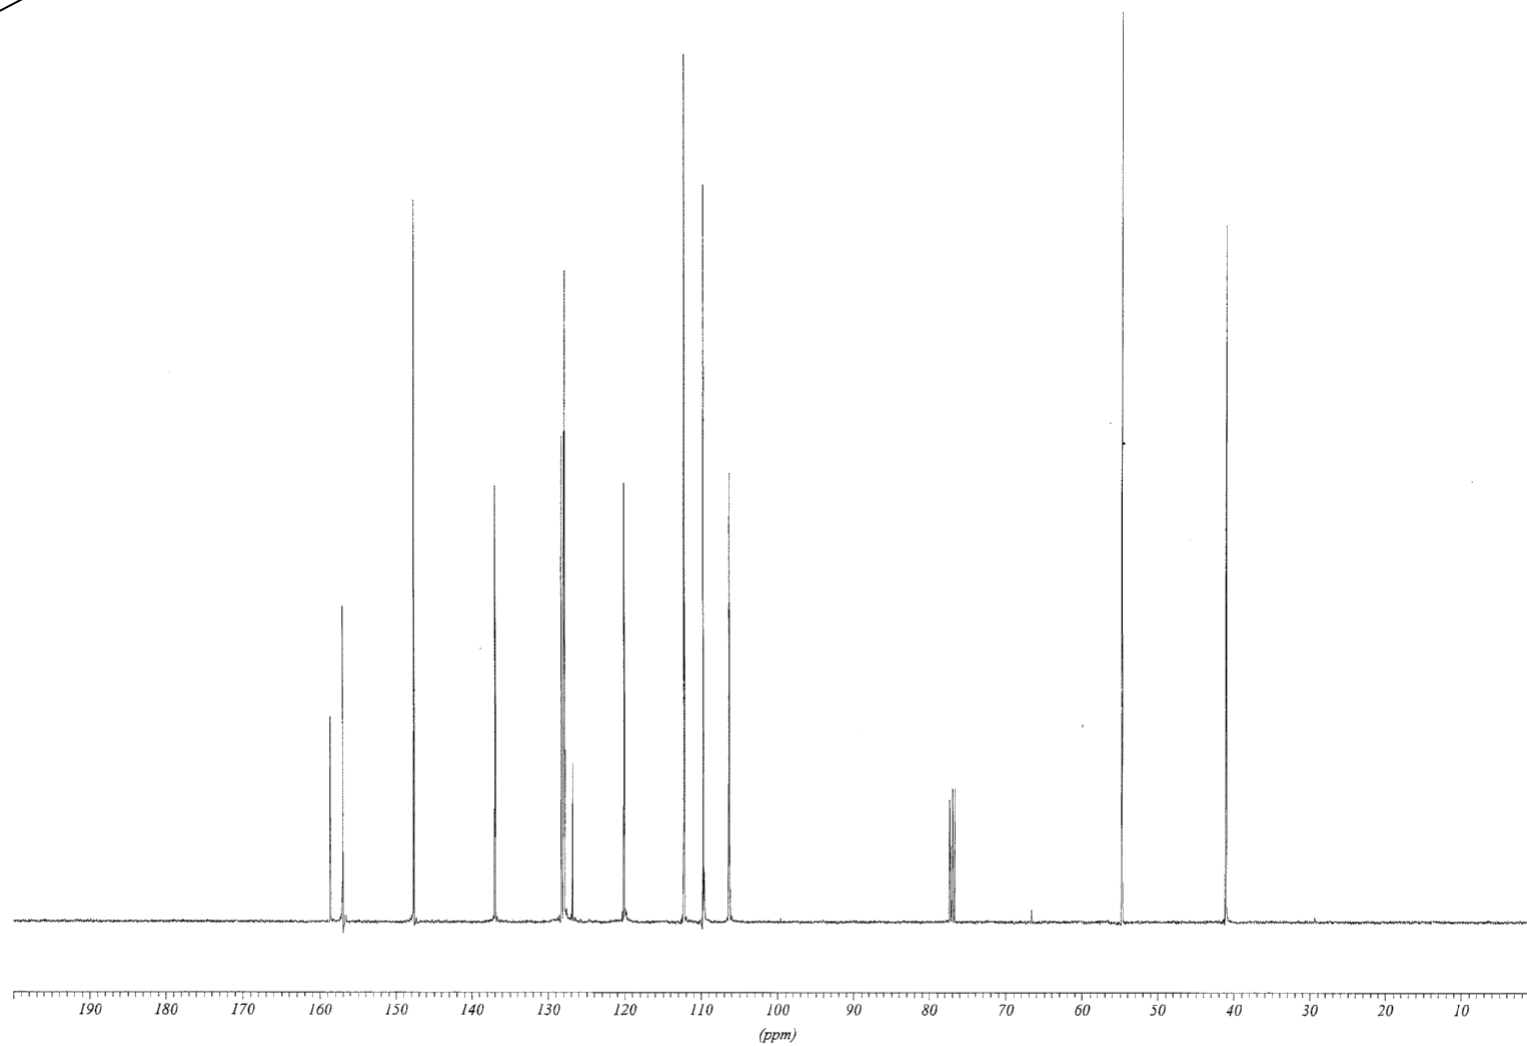

# <sup>1</sup>H-NMR

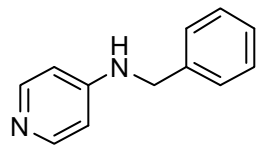

31

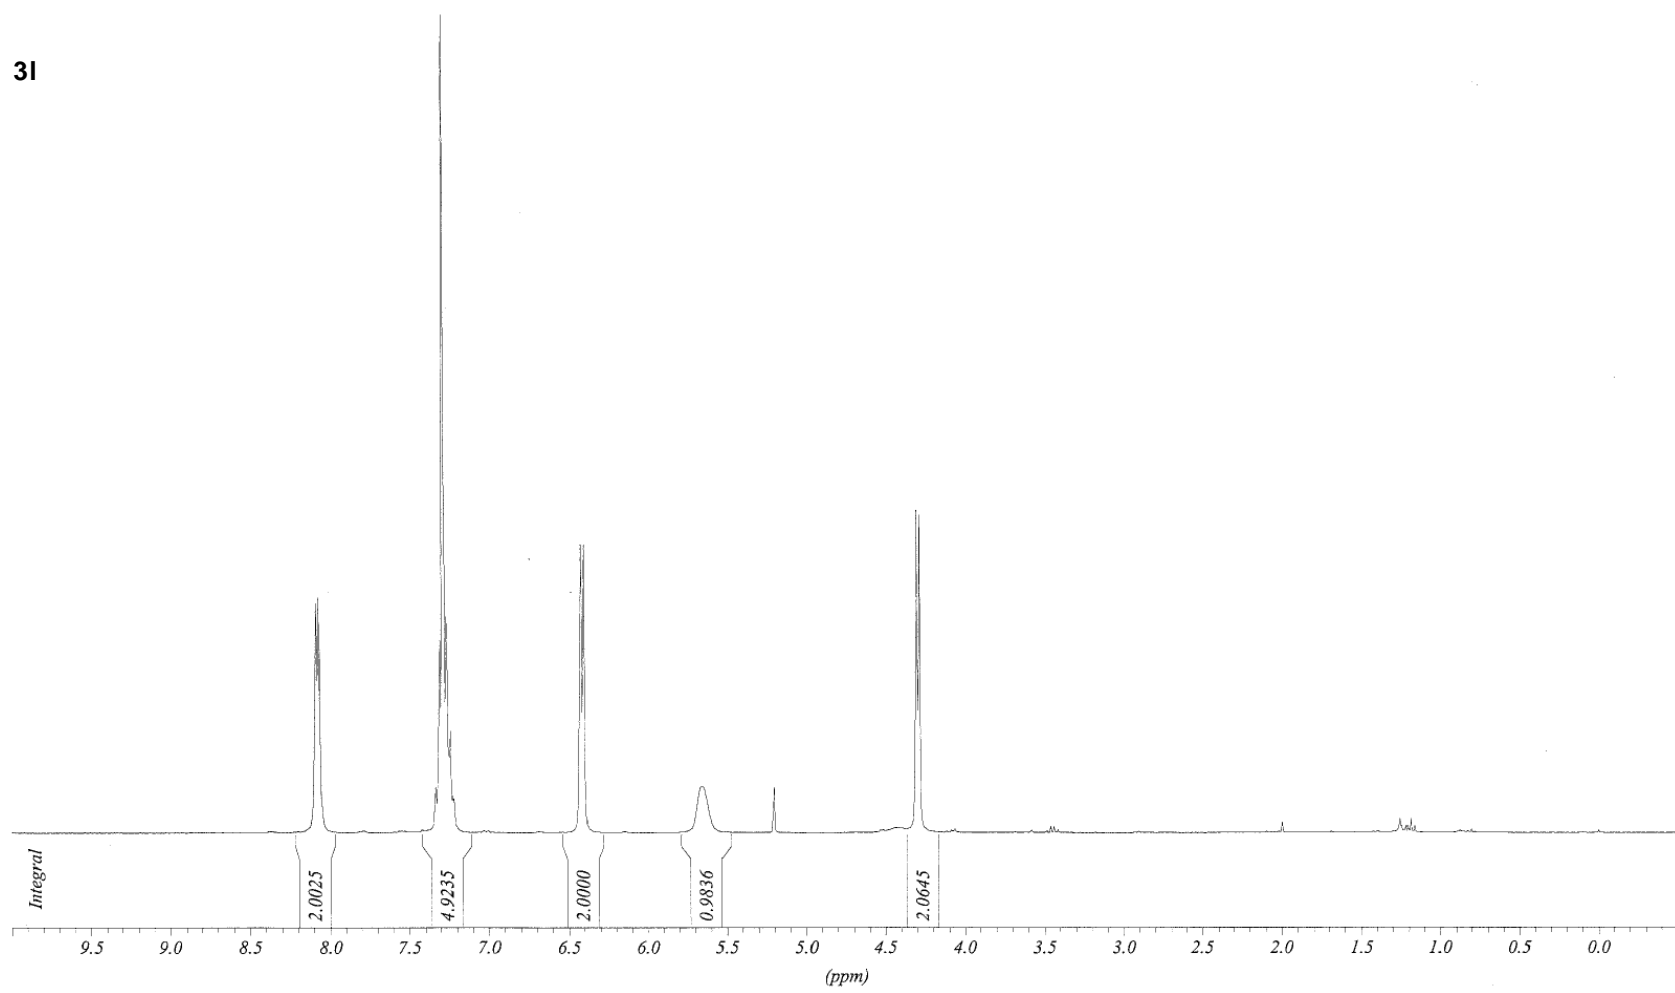

# $^{13}\text{C}$ -NMR

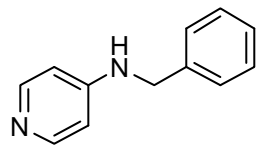

31

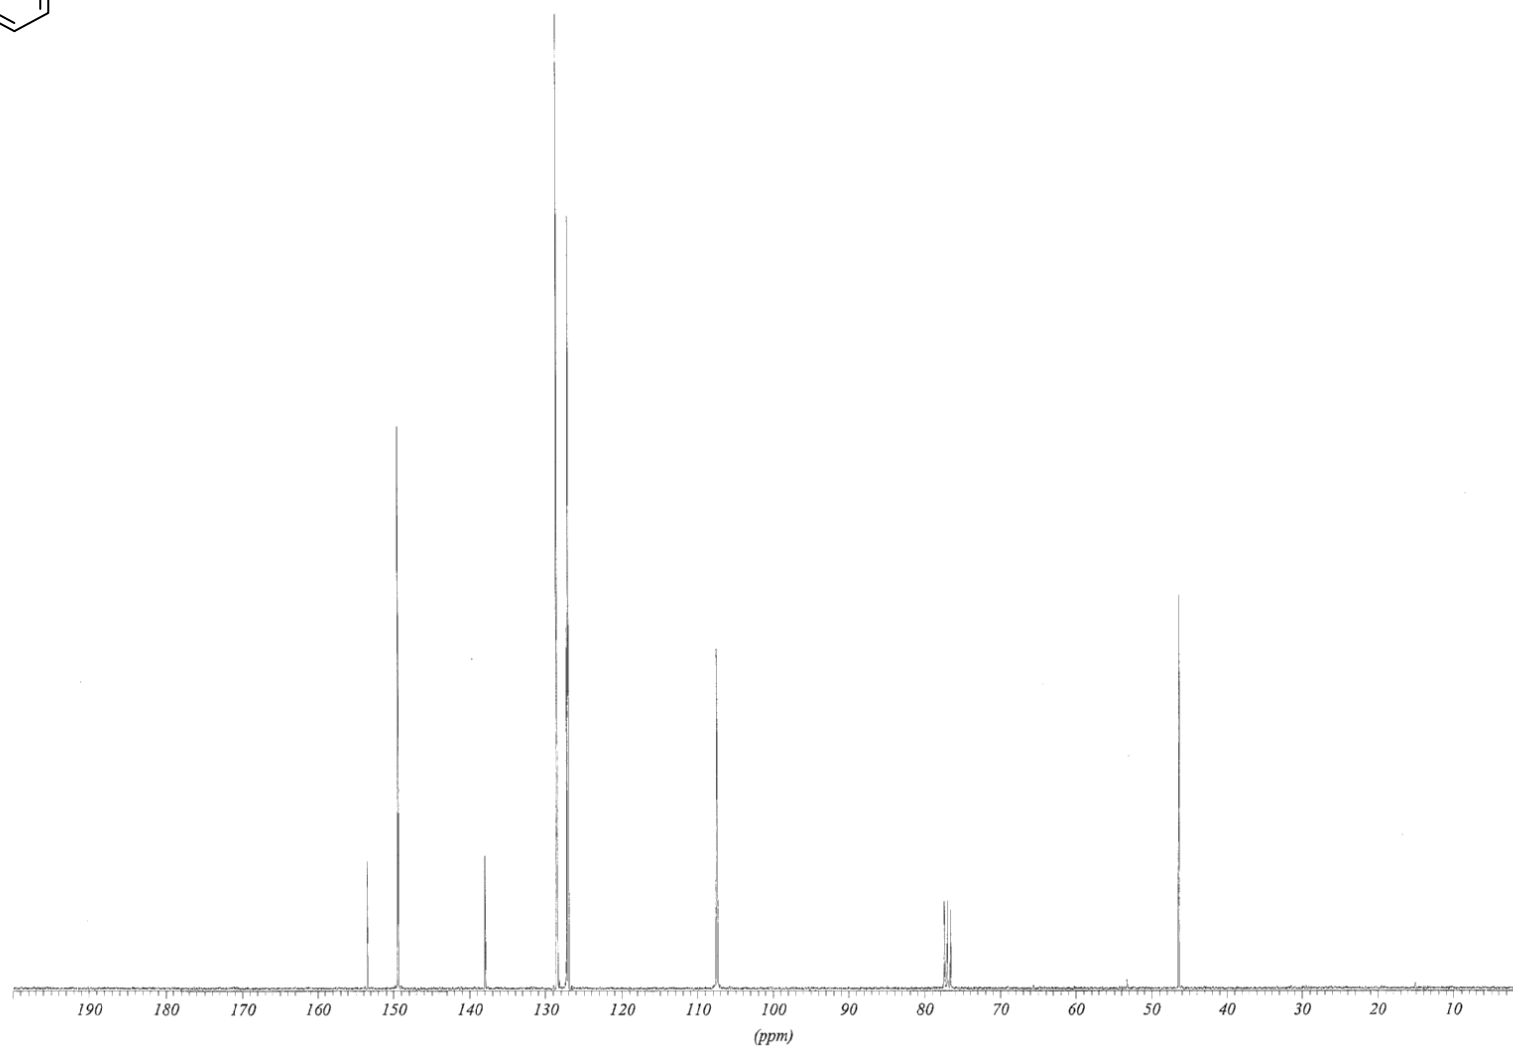

# <sup>1</sup>H-NMR

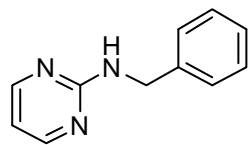

3m

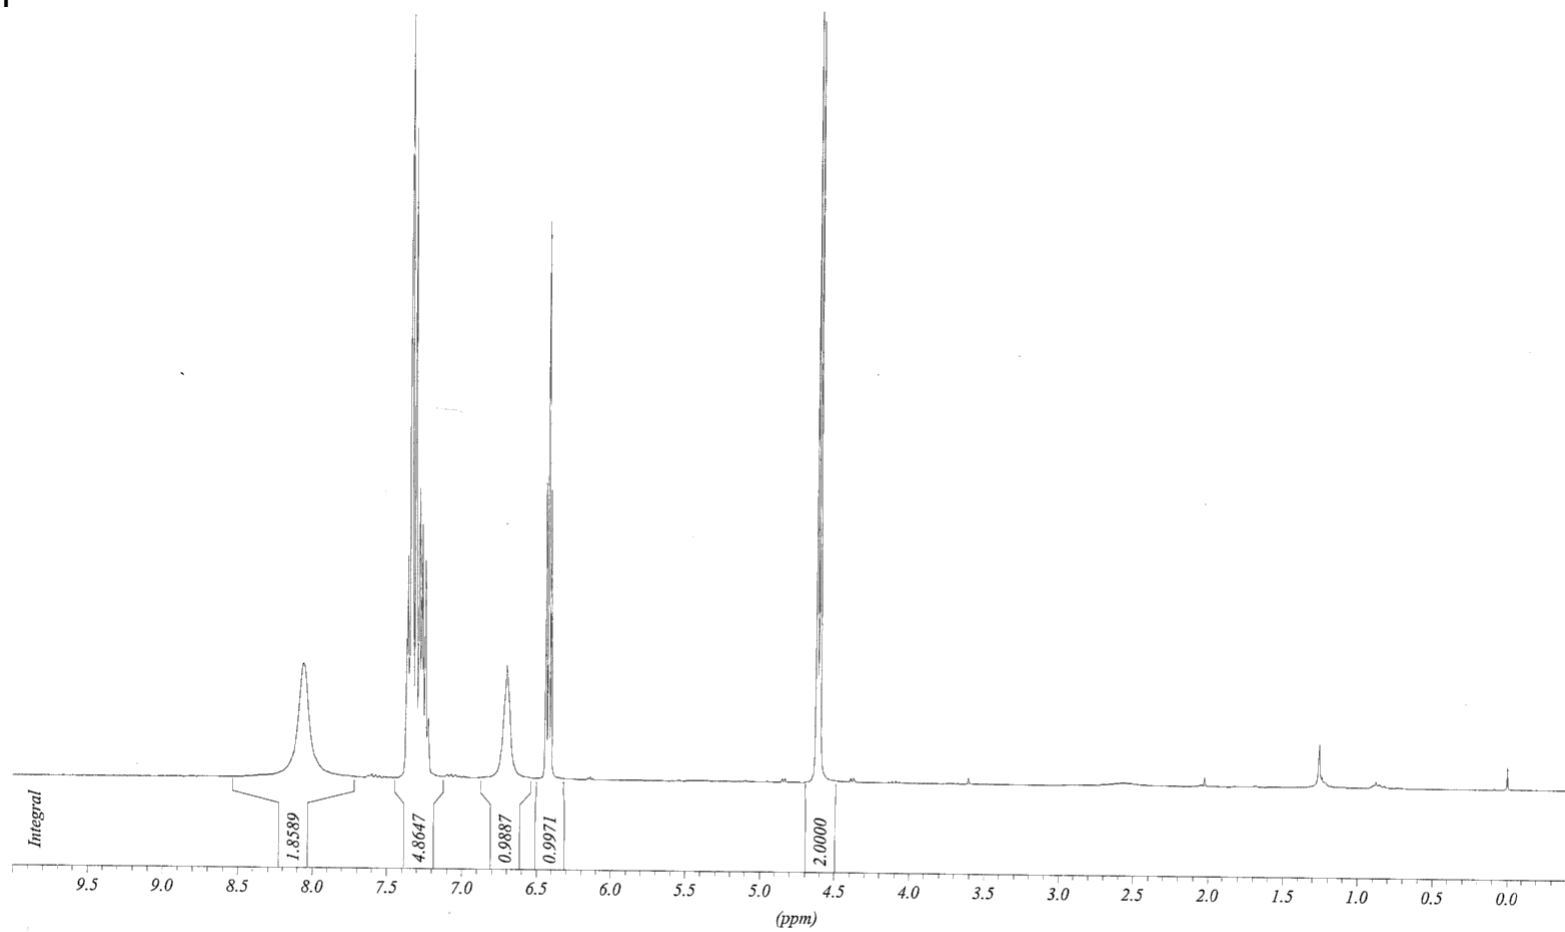

# <sup>13</sup>C-NMR

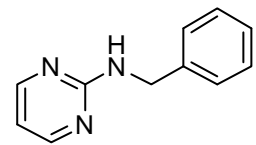

**3m**

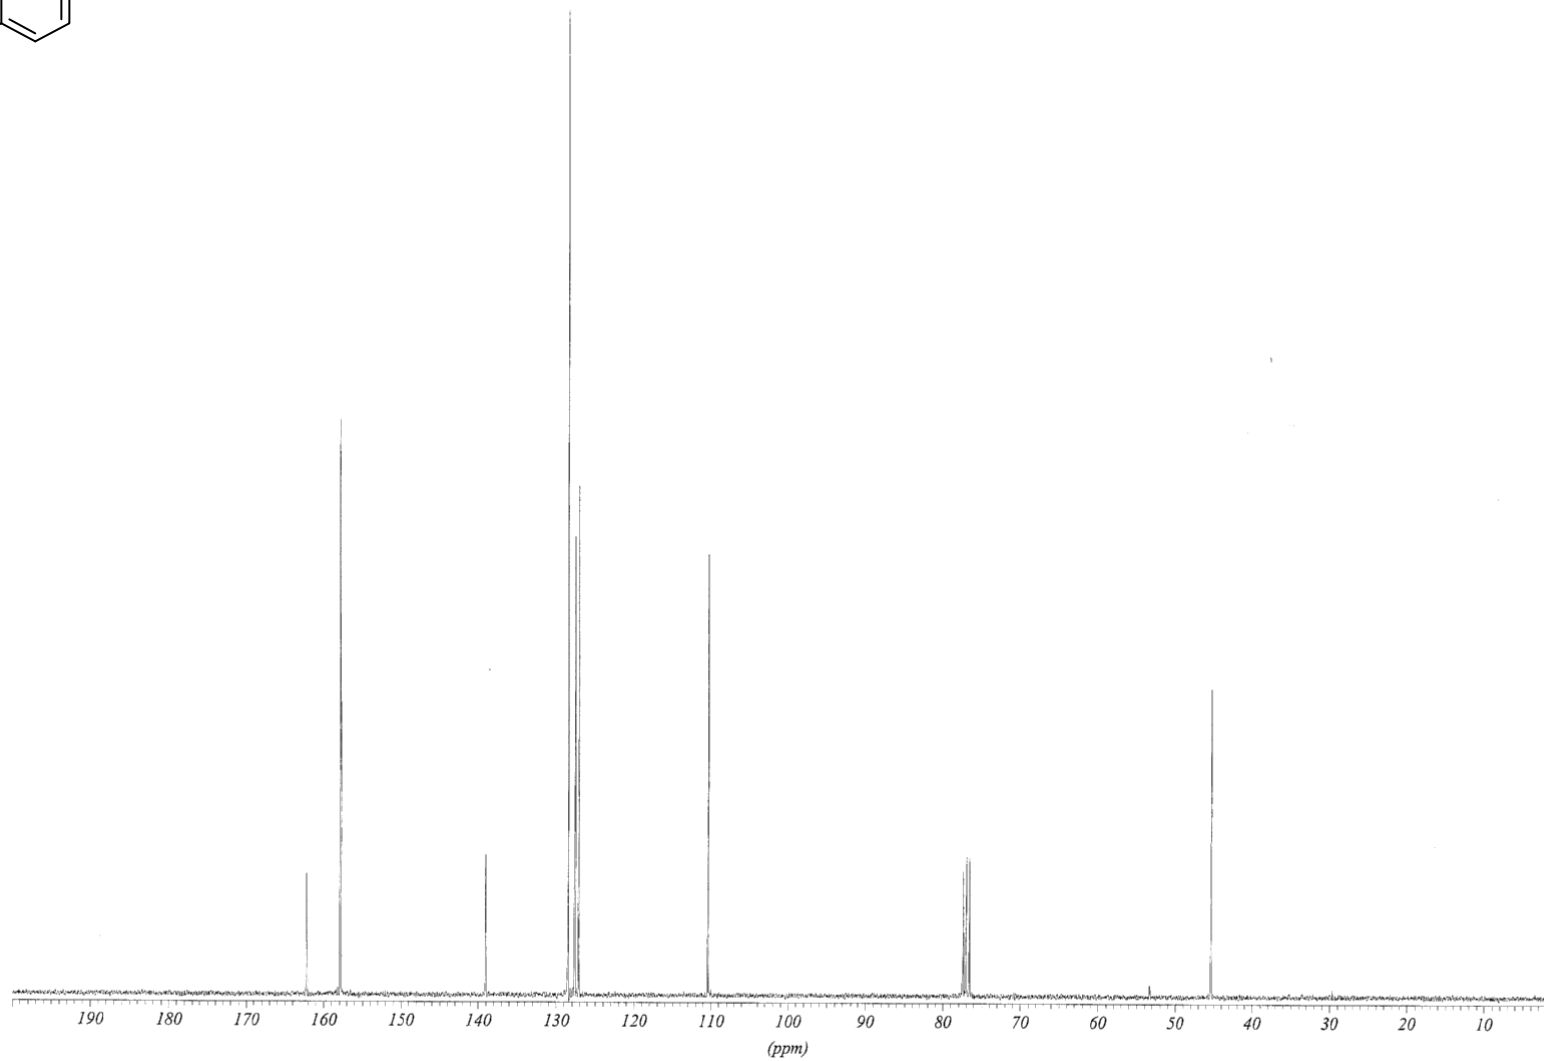

# <sup>1</sup>H-NMR

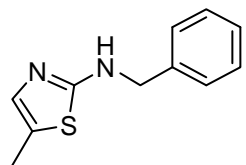

**3n**

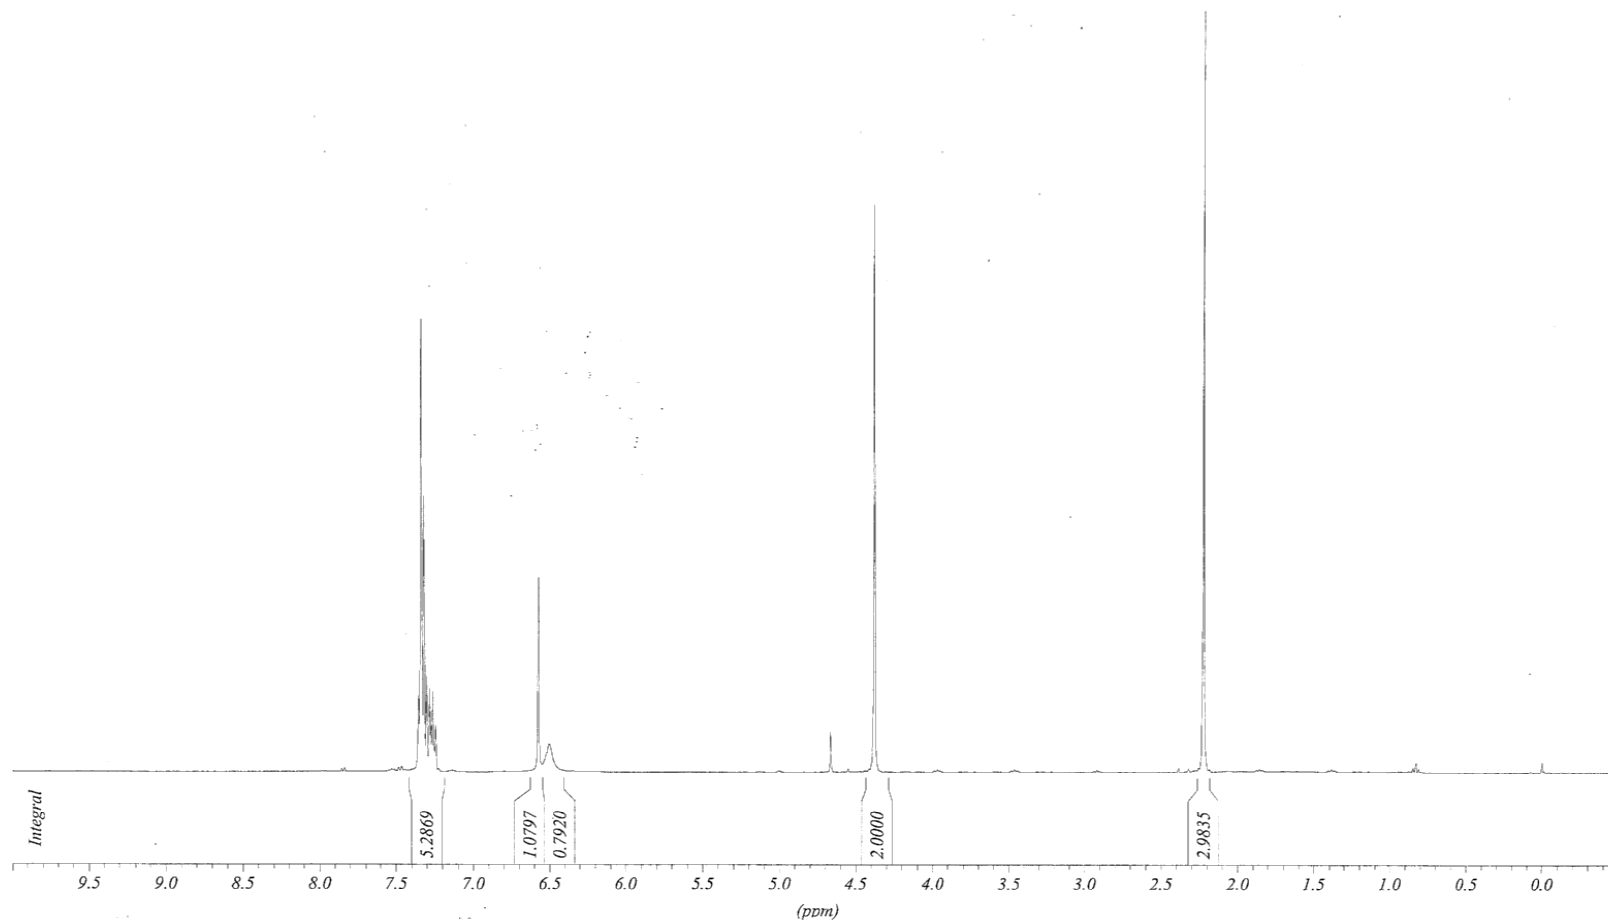

# $^{13}\text{C}$ -NMR

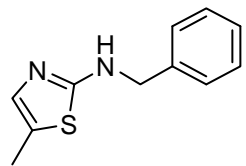

**3n**

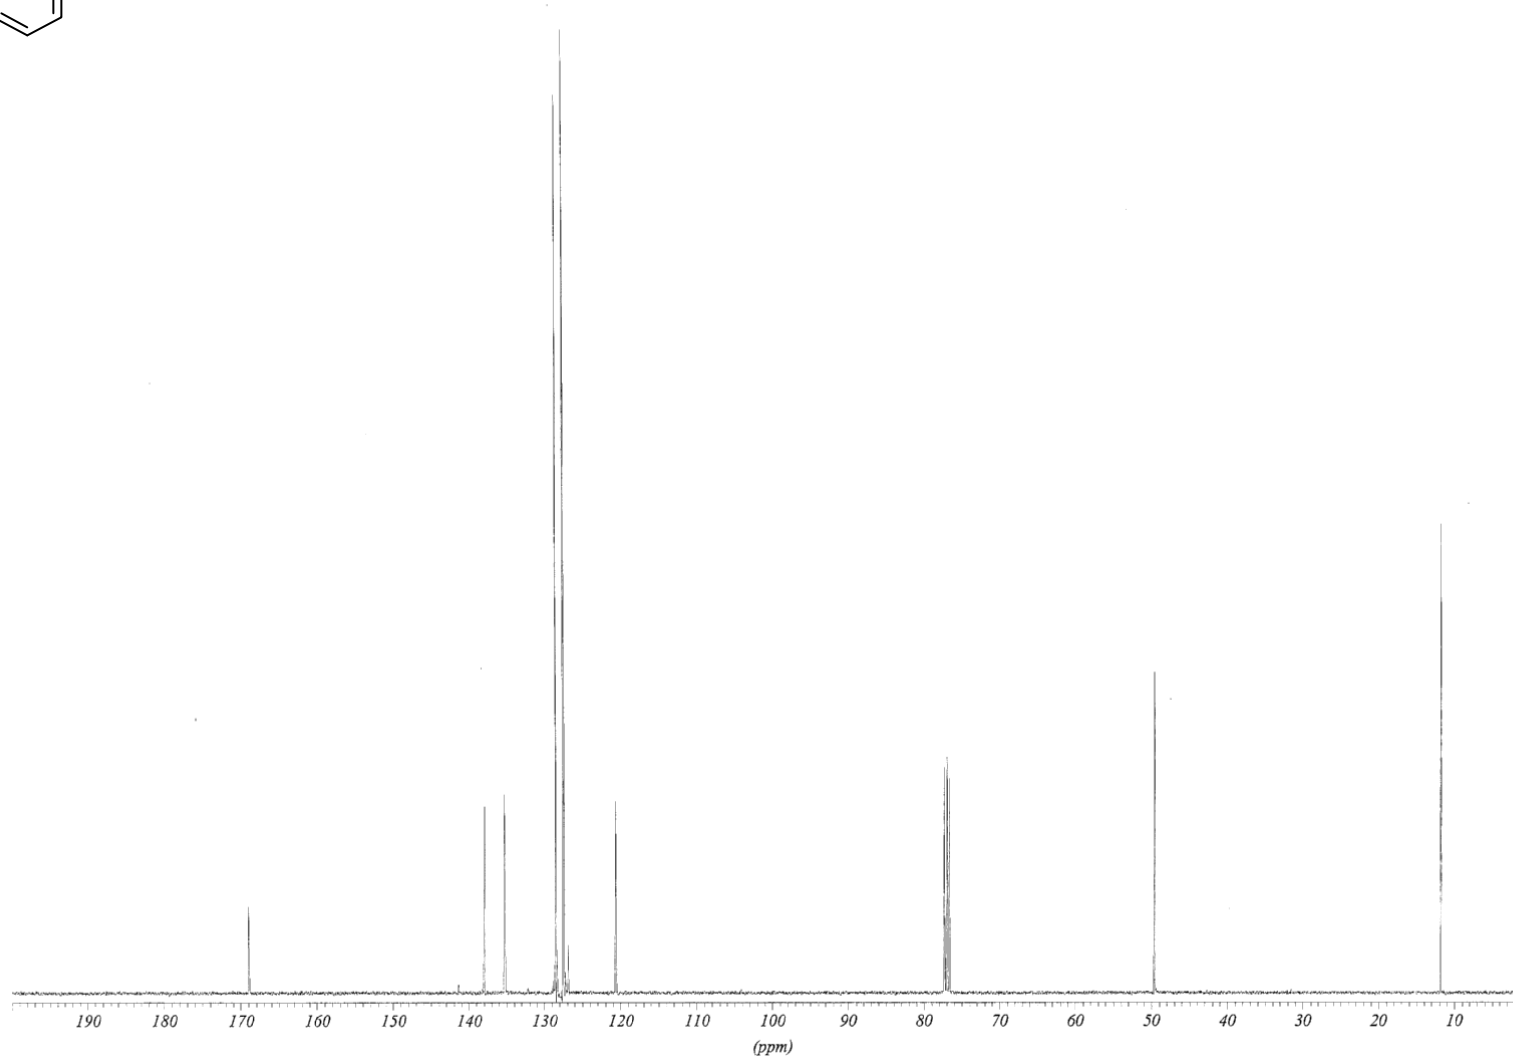

Supplement: b901929d.pdf [file b901929d.pdf]
